# Supplementary material for: Pharmacological induction of MHC-I expression in tumor cells revitalizes T cell antitumor immunity
Source: JCI journal article supplement (doi:10.1172/jci.insight.177788), 2024-08-06

Full unedited gel for Figure 1E

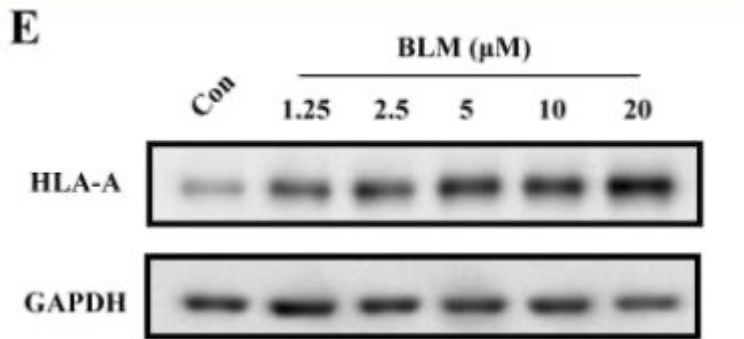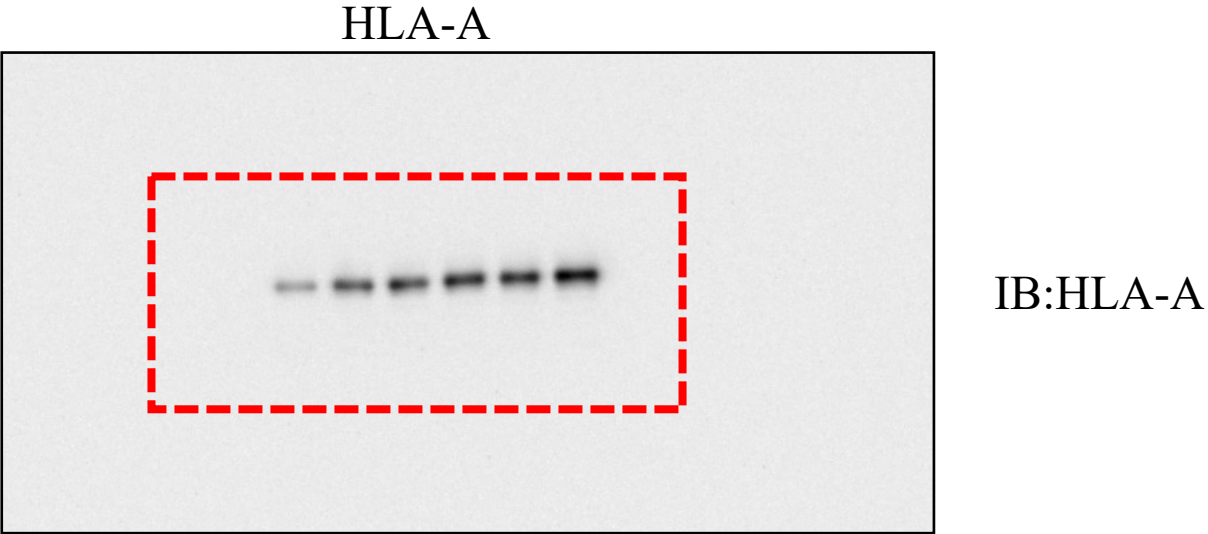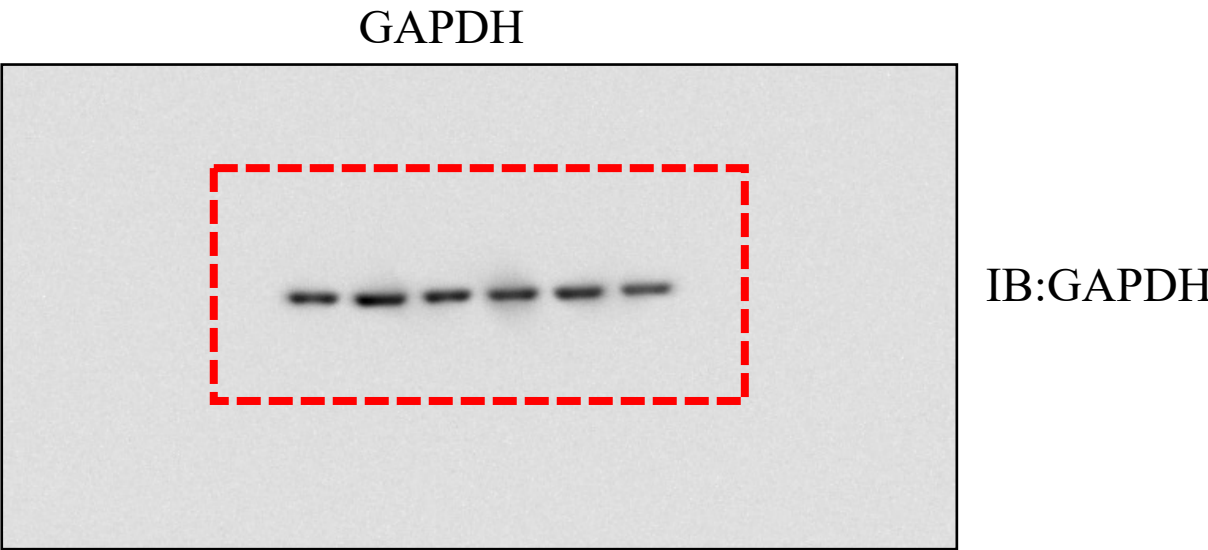

Full unedited gel for Figure 1F

**F**

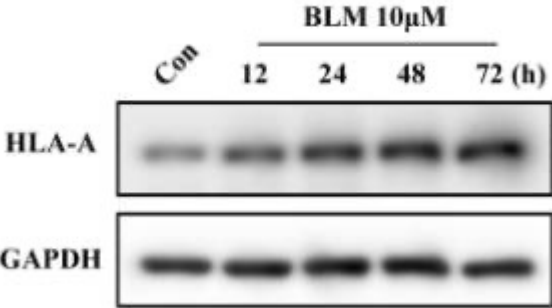

HLA-A

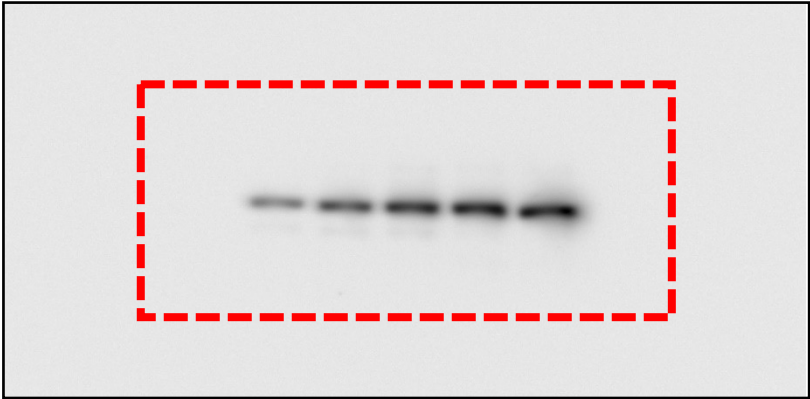

IB:HLA-A

GAPDH

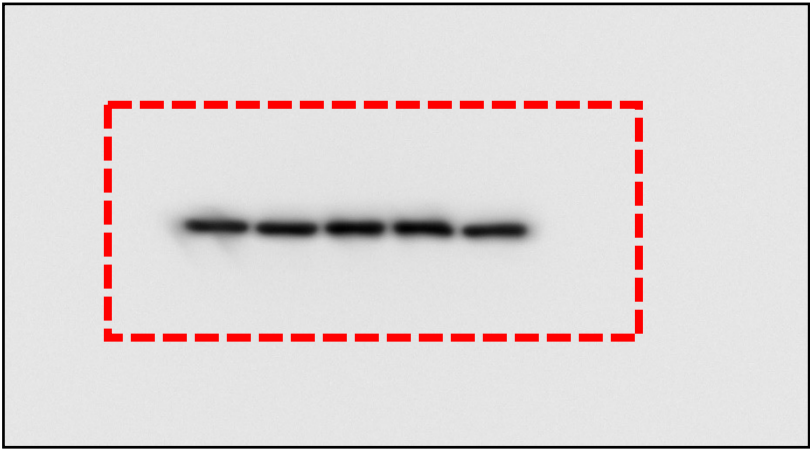

IB:GAPDH

Full unedited gel for Figure 2E

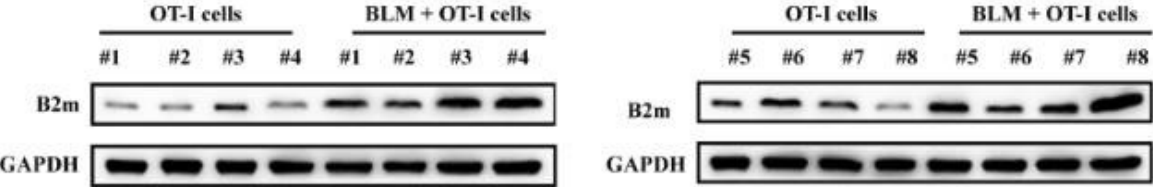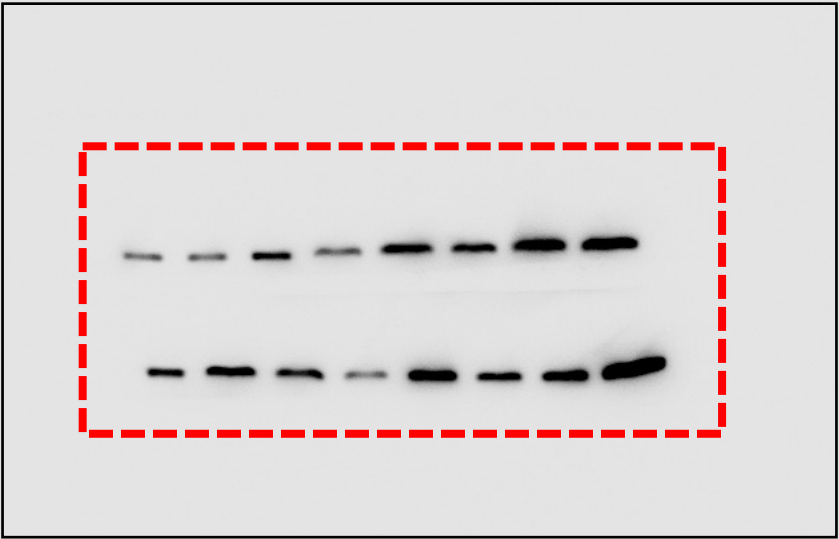

IB:B2m

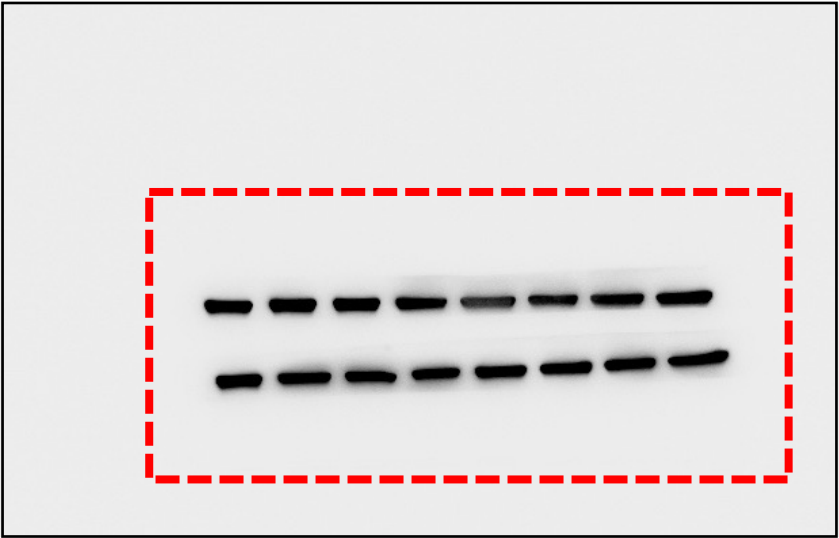

IB:GAPDH

Full unedited gel for Figure 5B

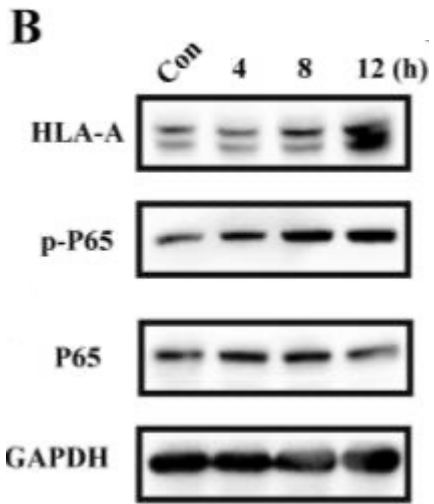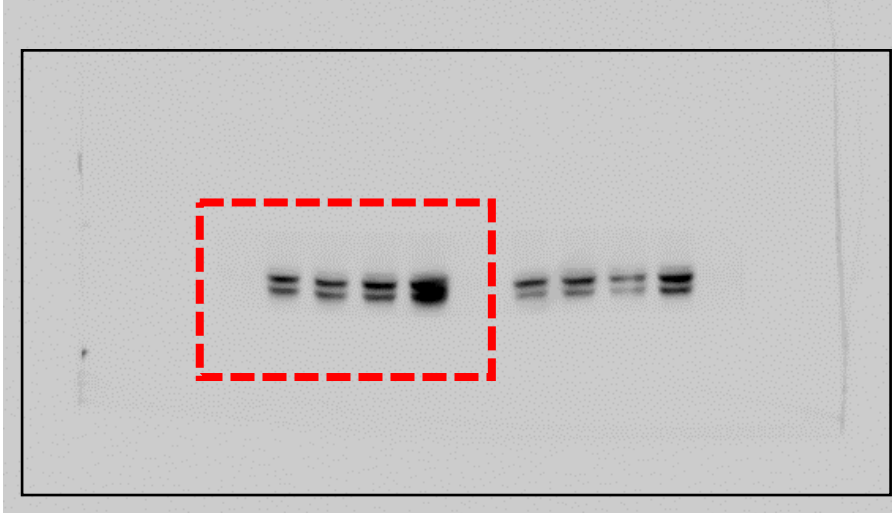

IB:HLA-A

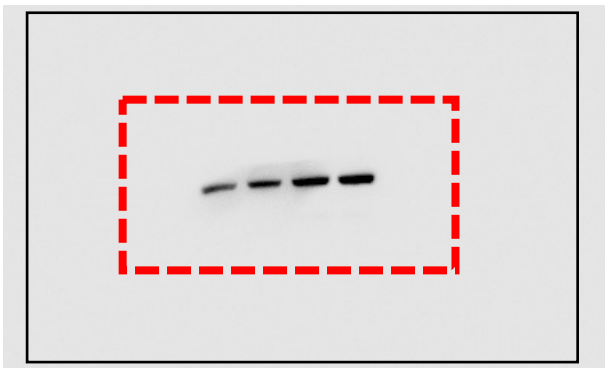

IB:p-P65

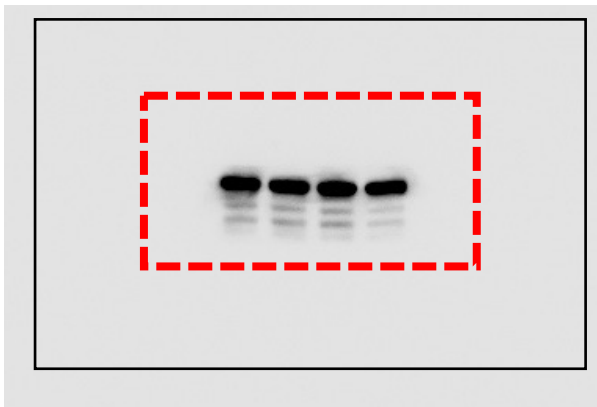

IB:P65

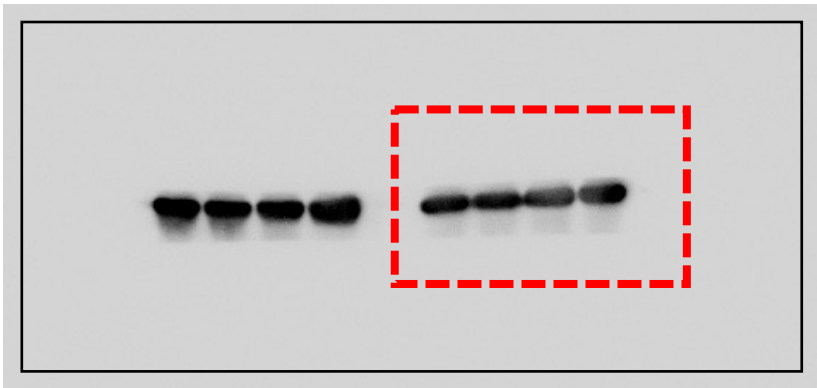

IB:GAPDH



Full unedited gel for Figure 5C

|       |            |                                                                                   |   |   |
|-------|------------|-----------------------------------------------------------------------------------|---|---|
| C     | BLM        | -                                                                                 | + | + |
|       | BAY11-7082 | -                                                                                 | - | + |
| HLA-A |            | 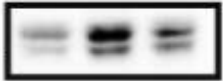 |   |   |
| p-P65 |            |  |   |   |
| P65   |            |  |   |   |
| GAPDH |            |  |   |   |

IB:P65

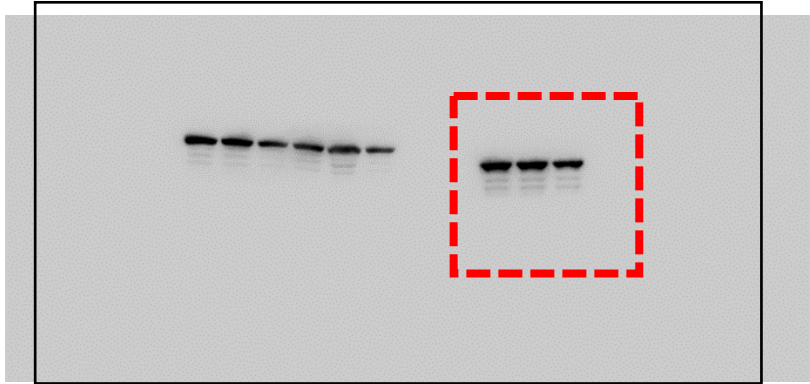

IB:GAPDH

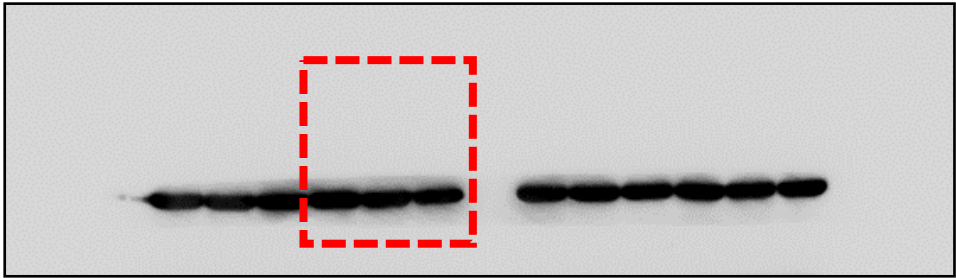

IB:p-P65

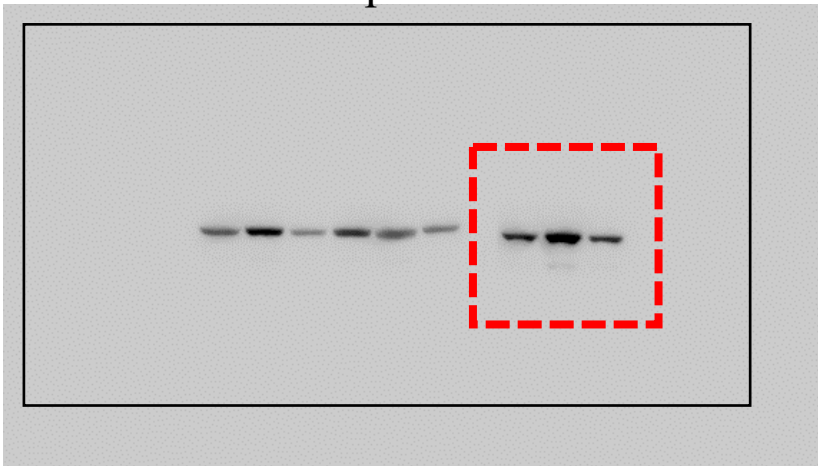

IB:HLA-A

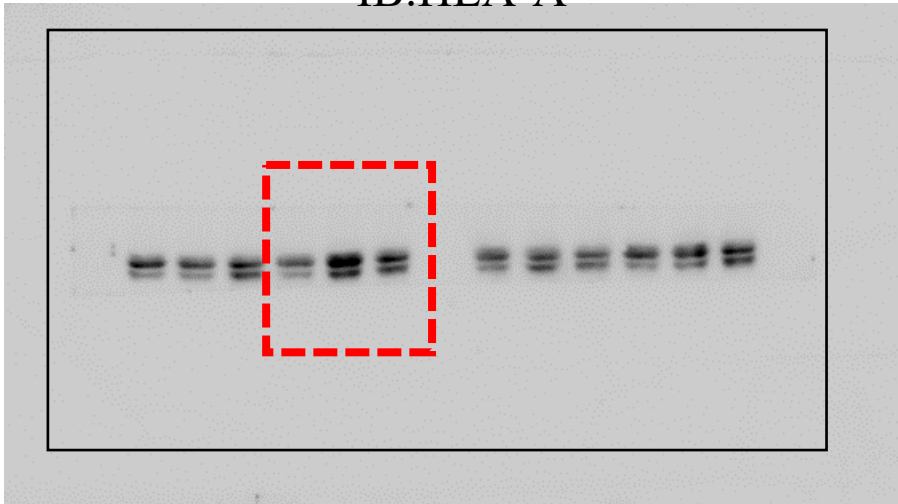

Full unedited gel for Figure 5D

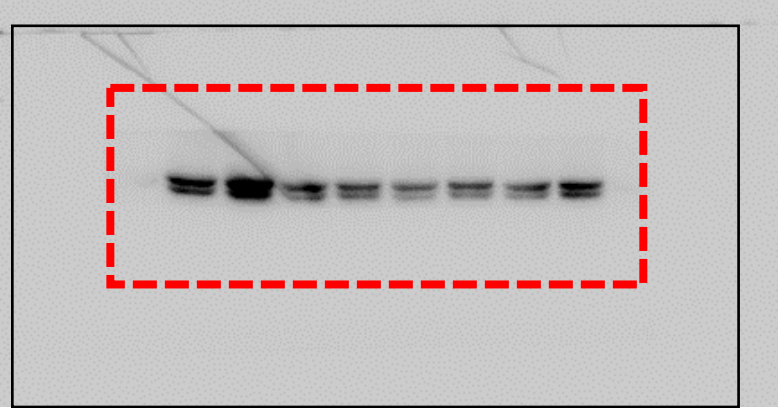

IB:HLA-A

D

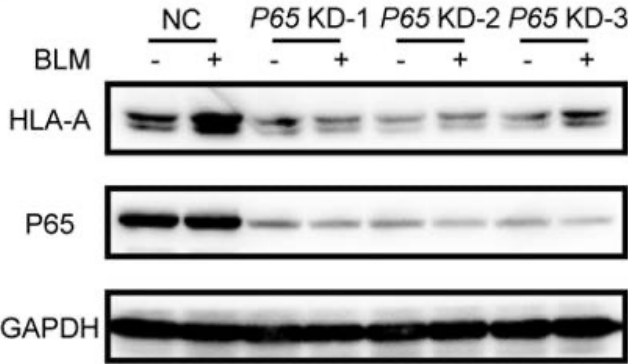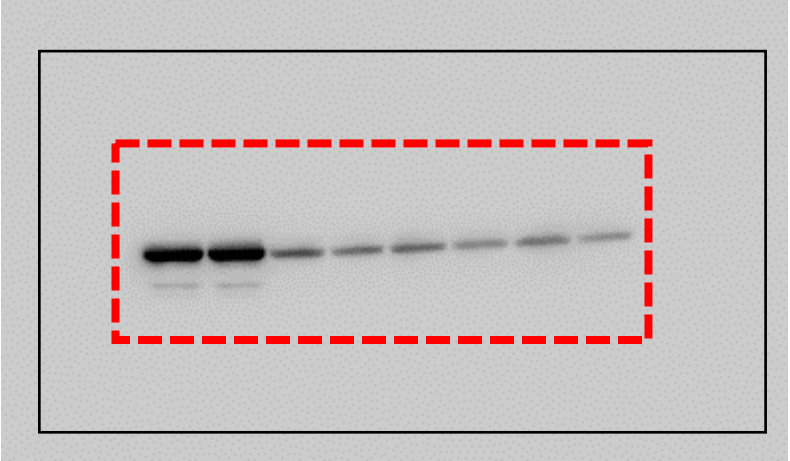

IB:P65

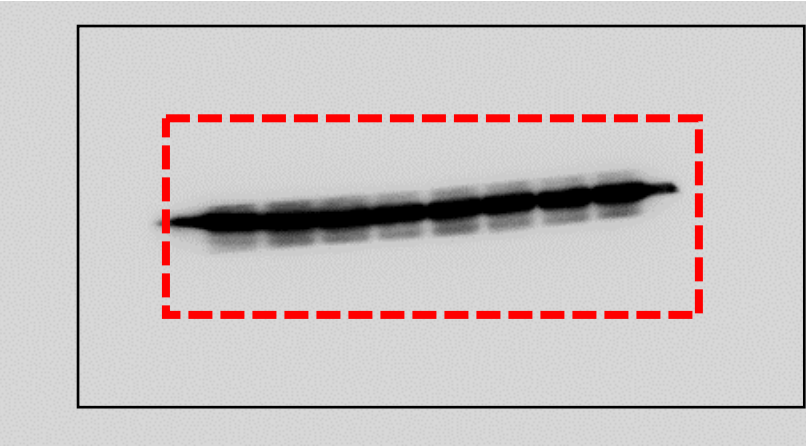

IB:GAPDH

Full unedited gel for Figure 5G

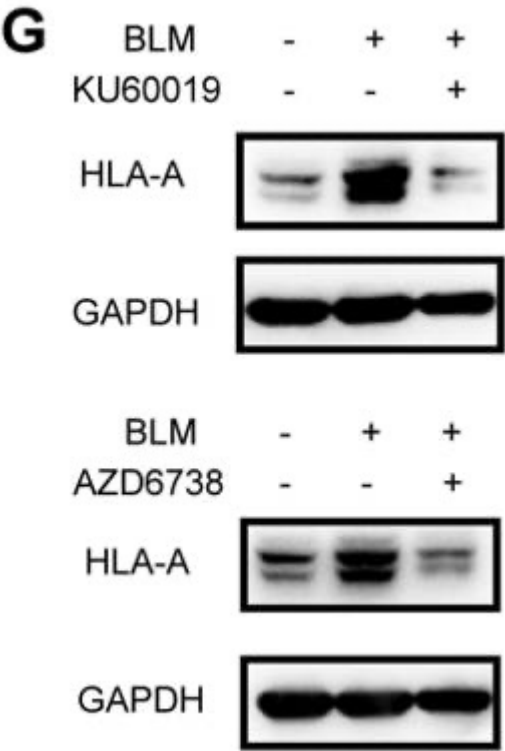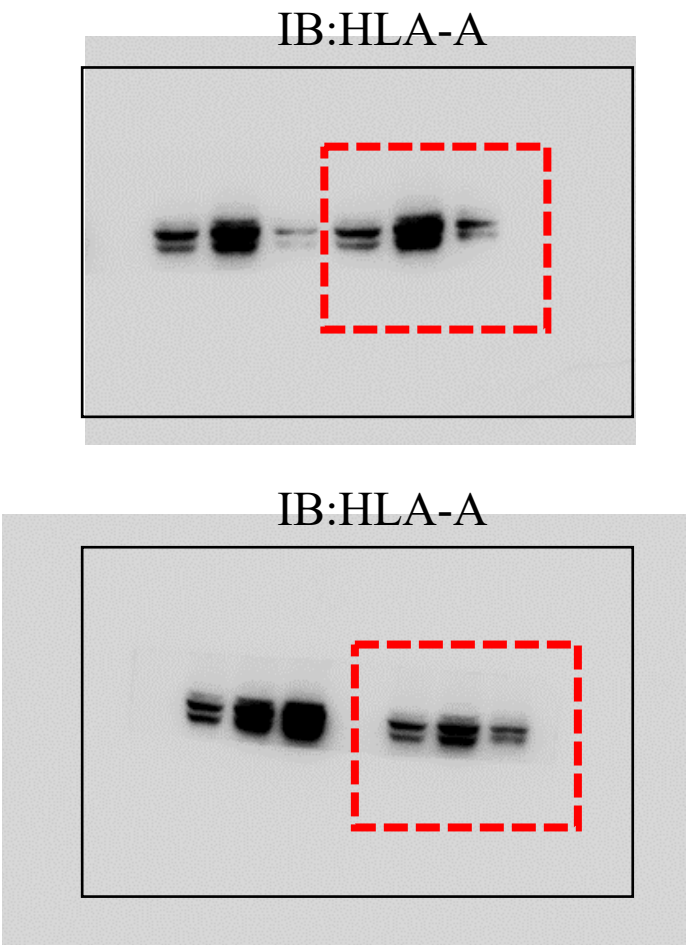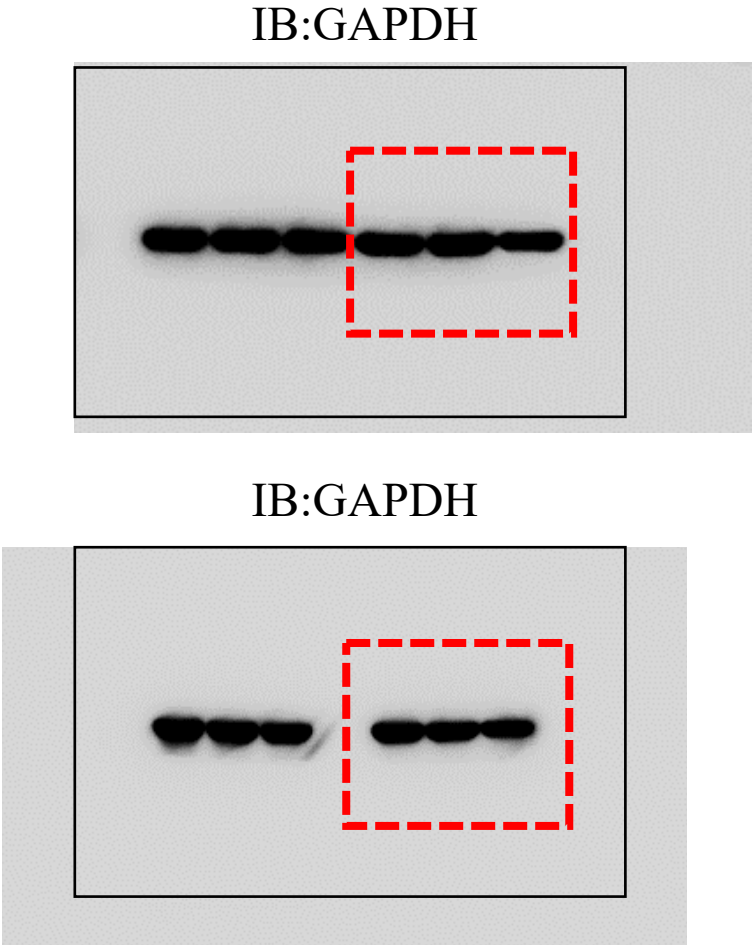

Full unedited gel for Figure 5I

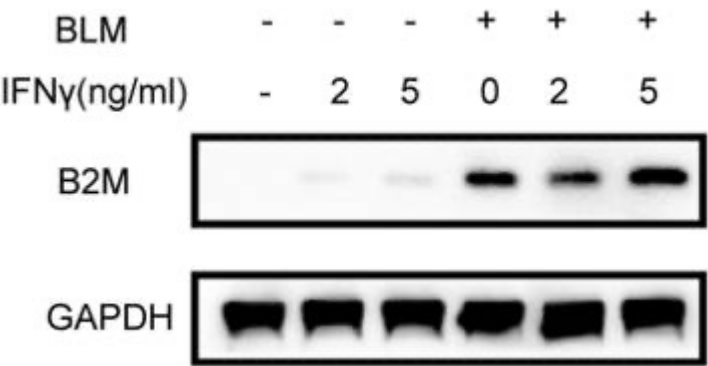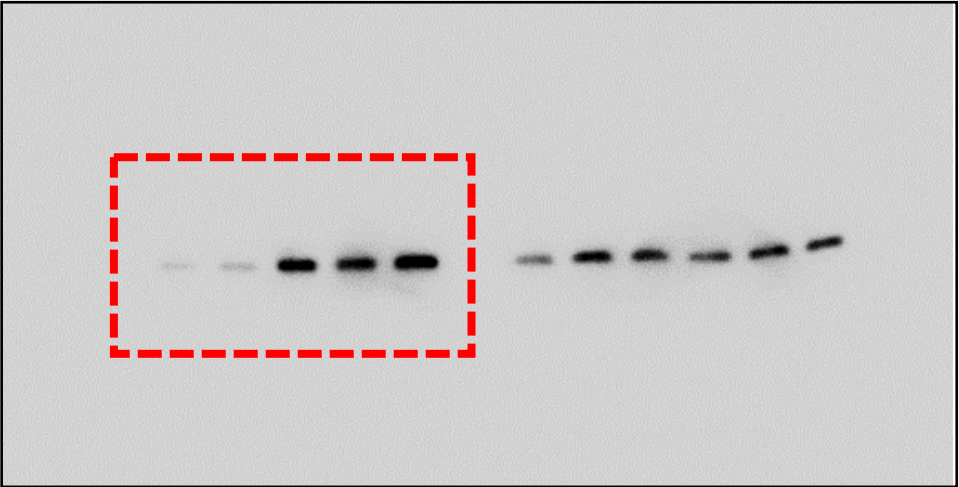

IB:B2M

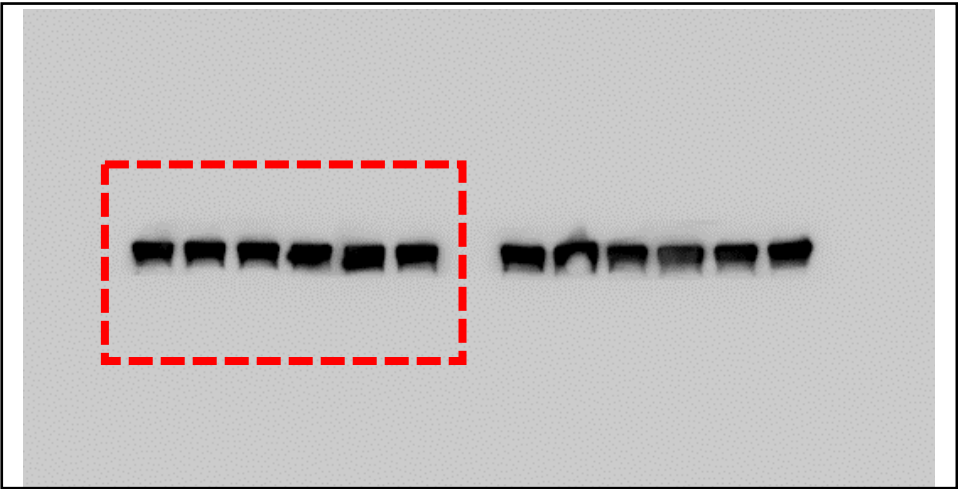

IB:GAPDH

Full unedited gel for  
Supplemental Figure 2A

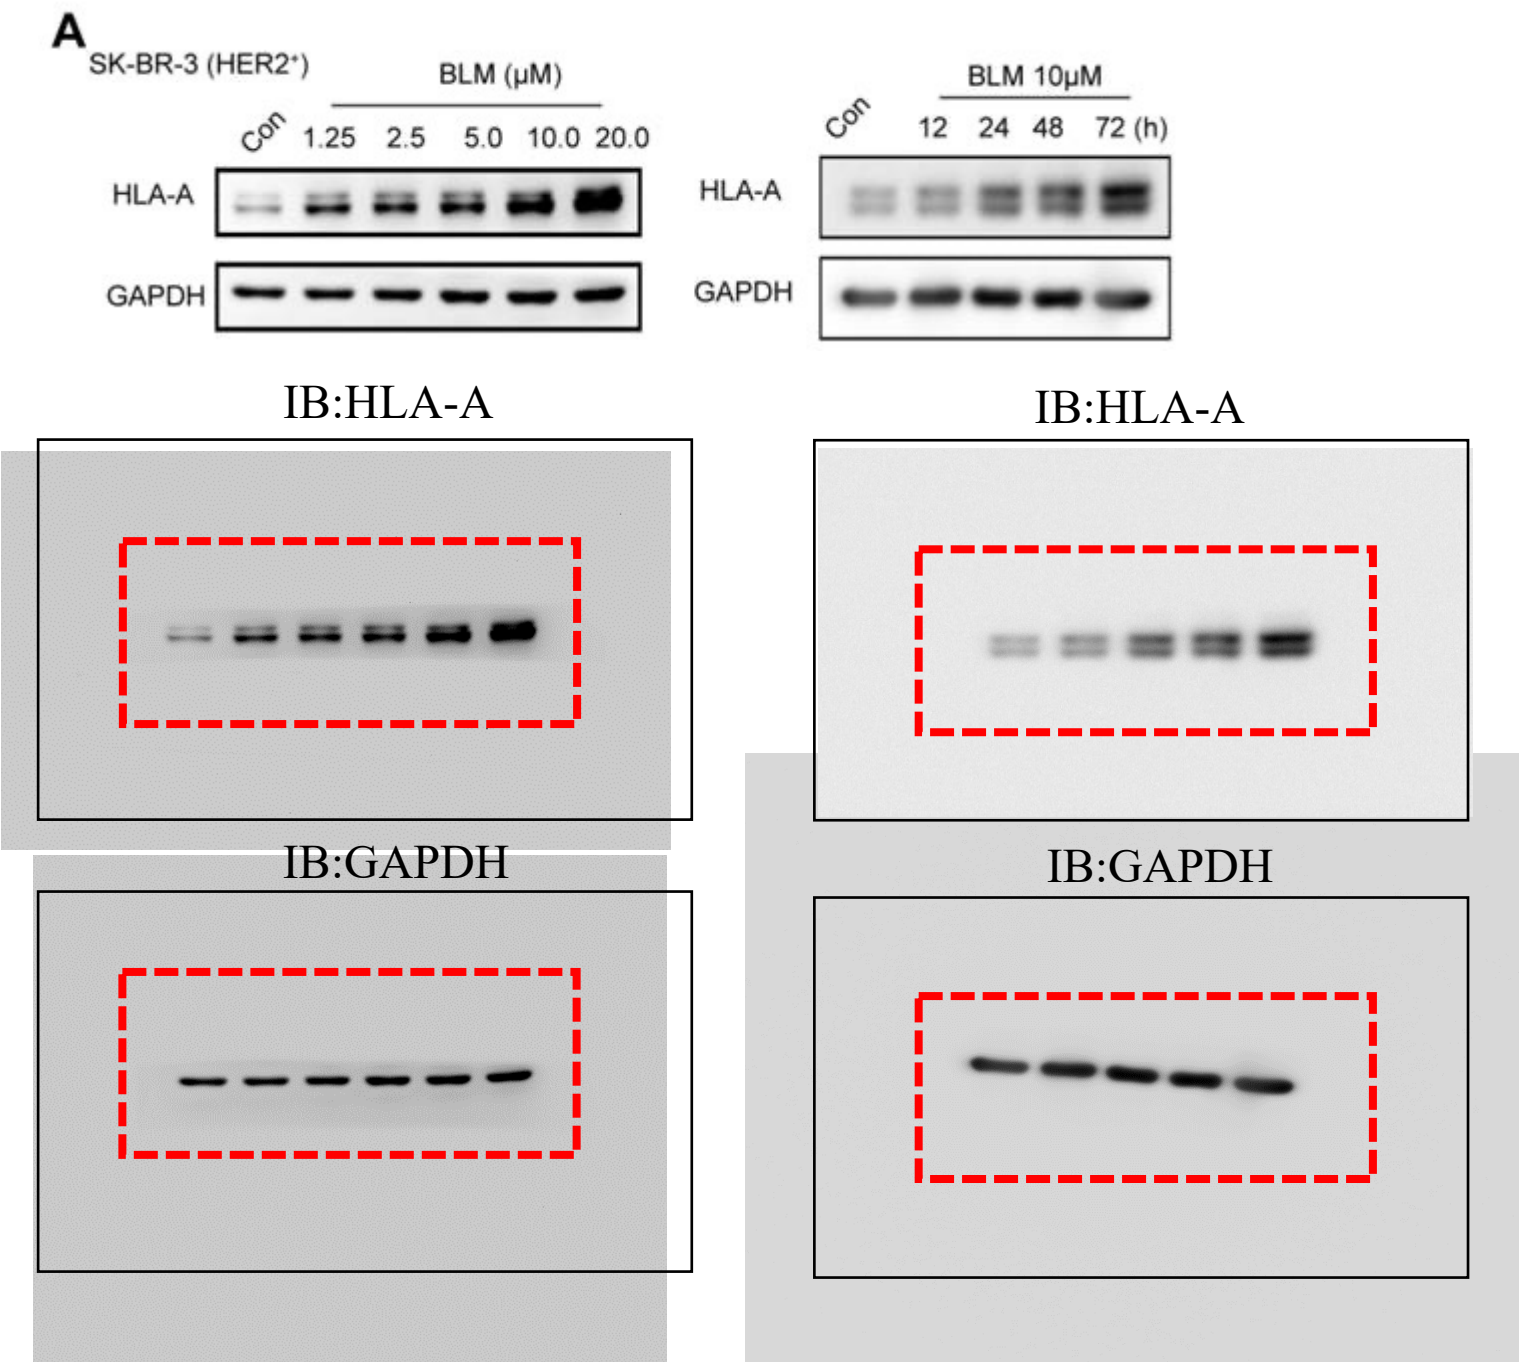



Full unedited gel for  
Supplemental Figure 2B

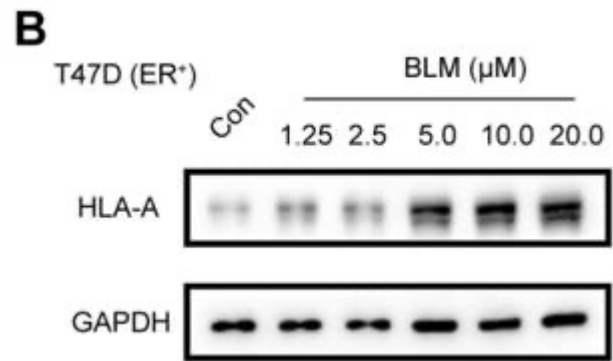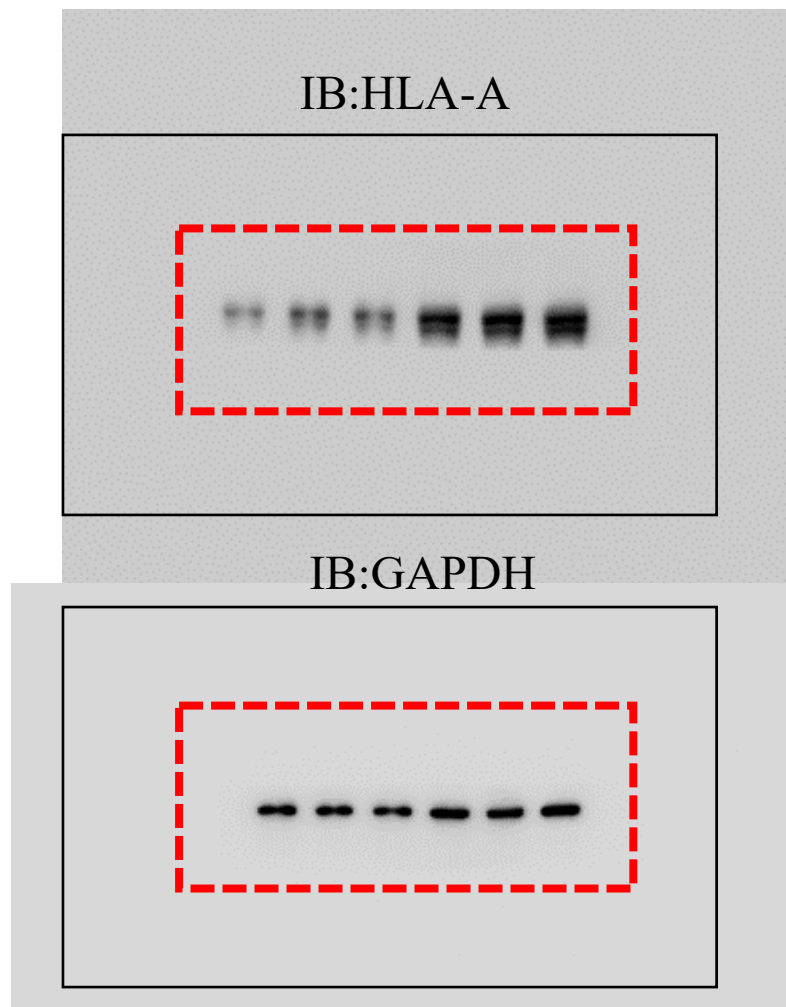

Supplemental Figure 2C

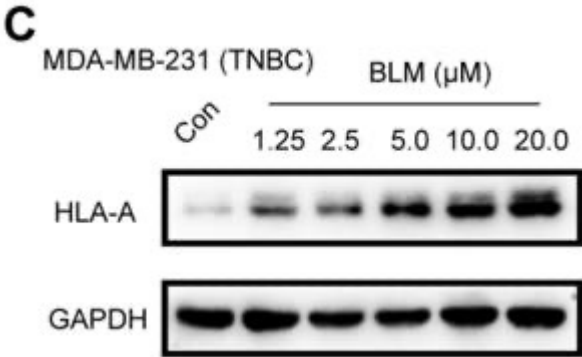

IB:HLA-A

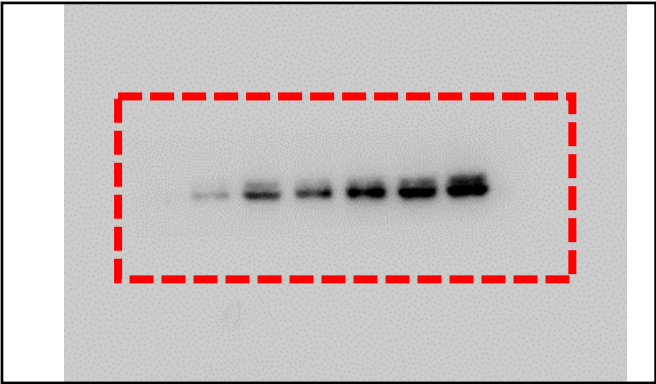

IB:GAPDH

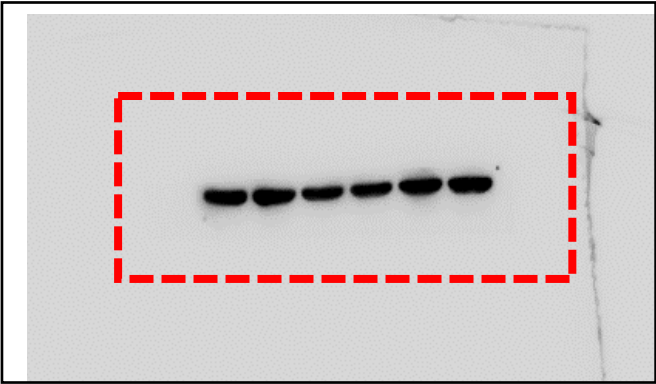

Full unedited gel for  
Supplemental Figure 2D

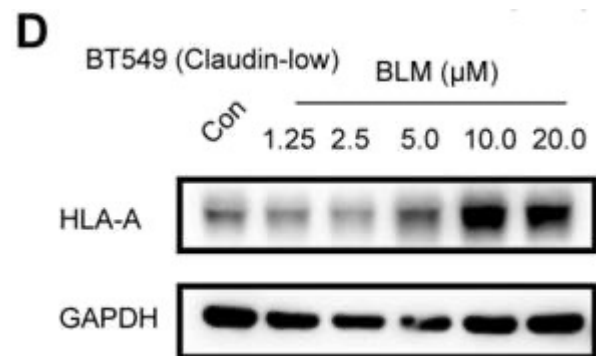

IB:HLA-A

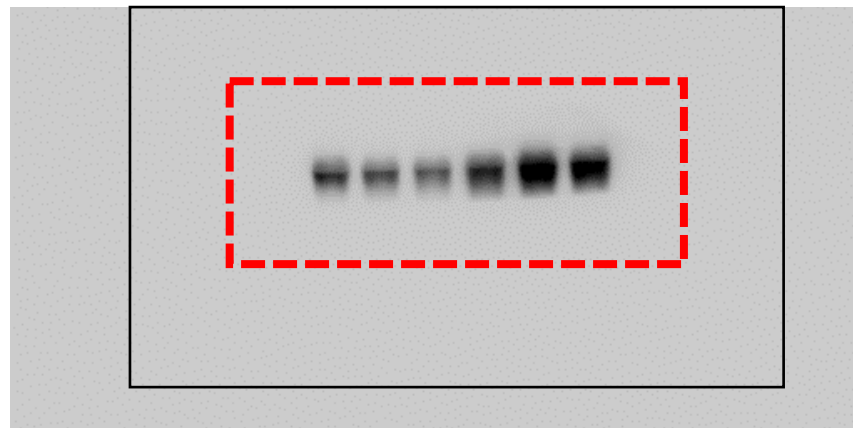

IB:GAPDH

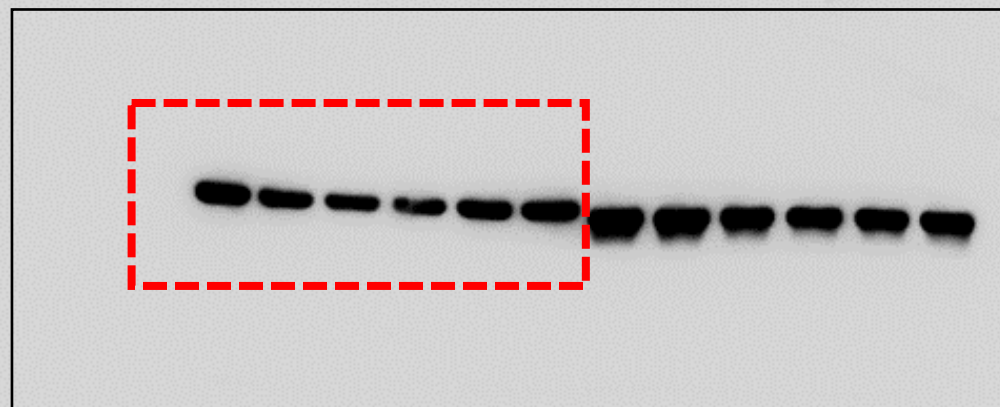



Full unedited gel for  
Supplemental Figure 2E

E

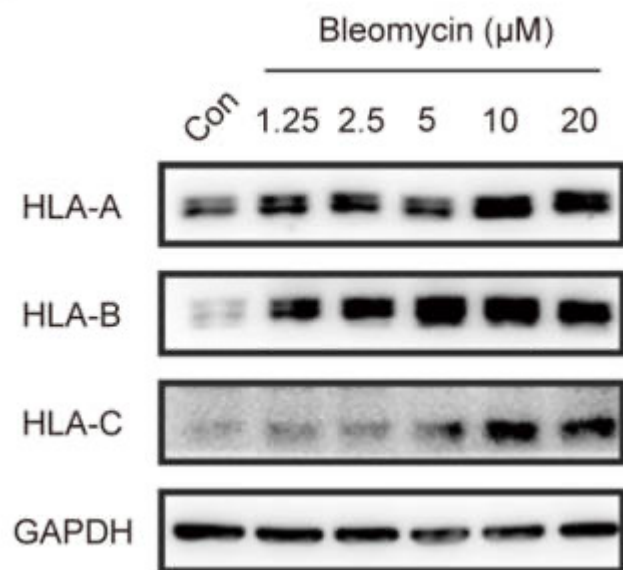

IB:HLA-A

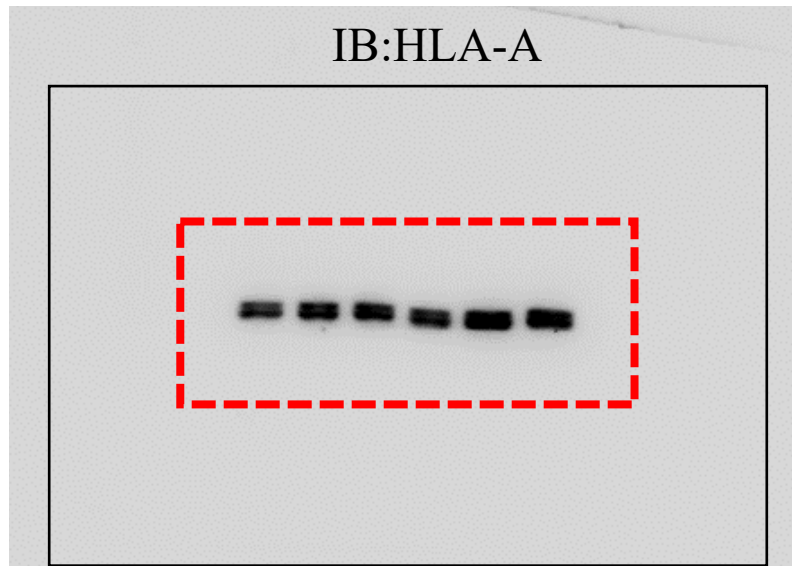

IB:HLA-B

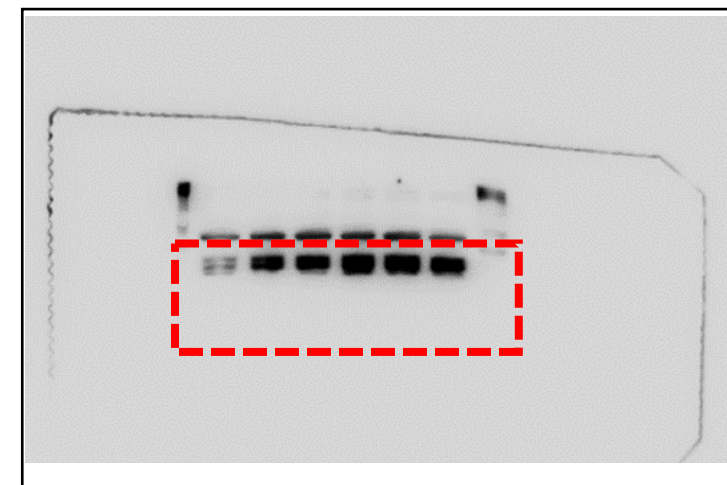

IB:HLA-C

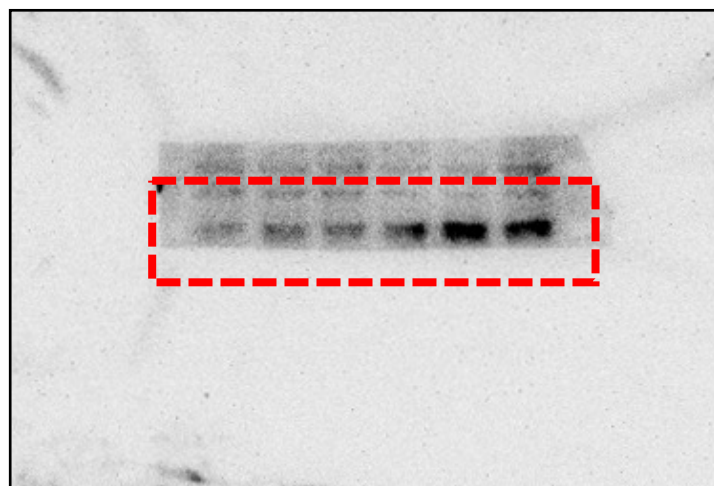

IB:GAPDH

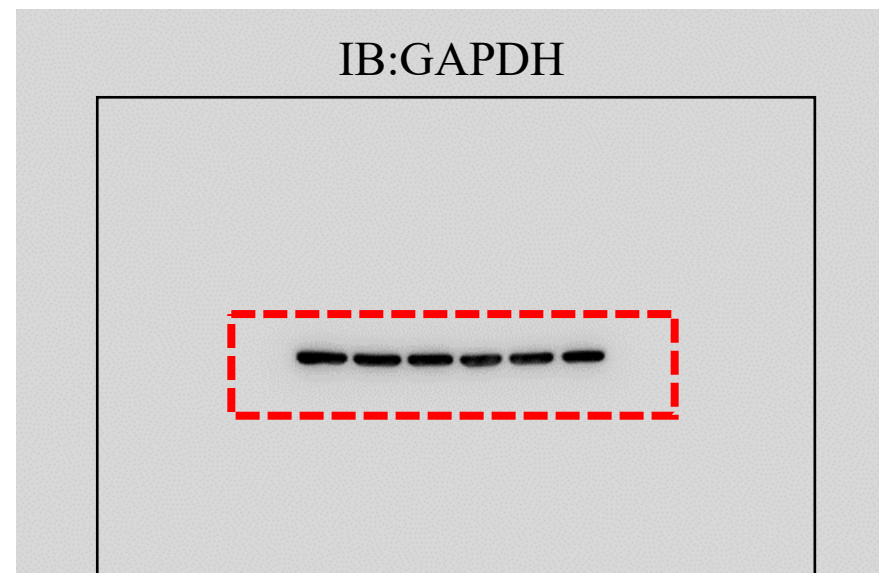

Full unedited gel for  
Supplemental Figure 2F

F

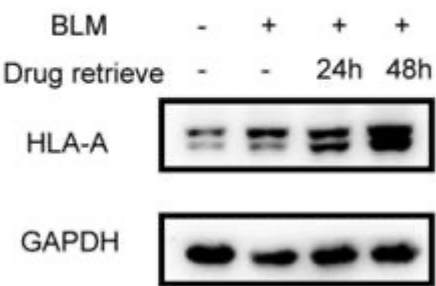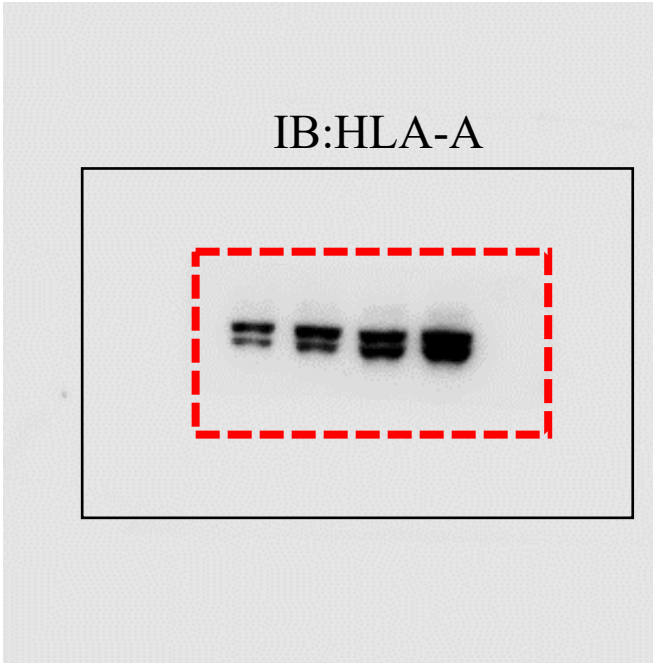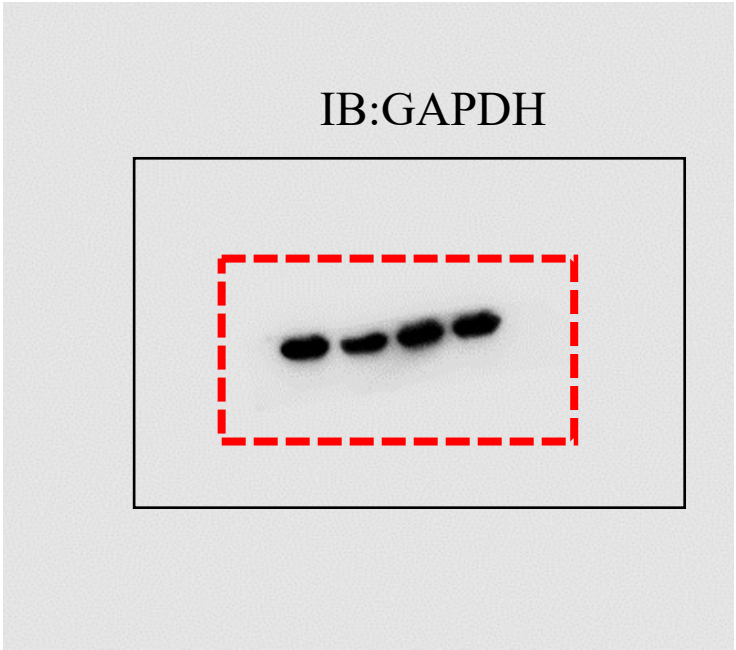

Full unedited gel for  
Supplemental Figure 3D

**D**

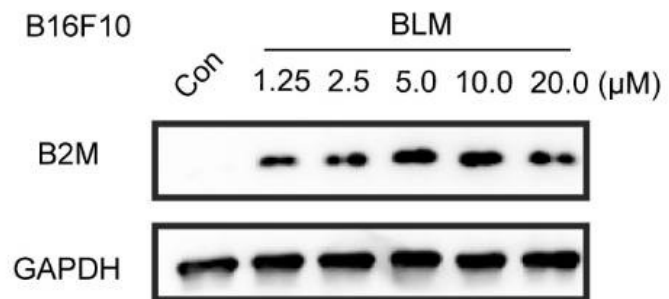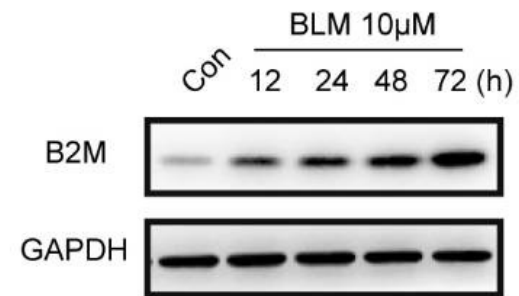

IB:HLA-A

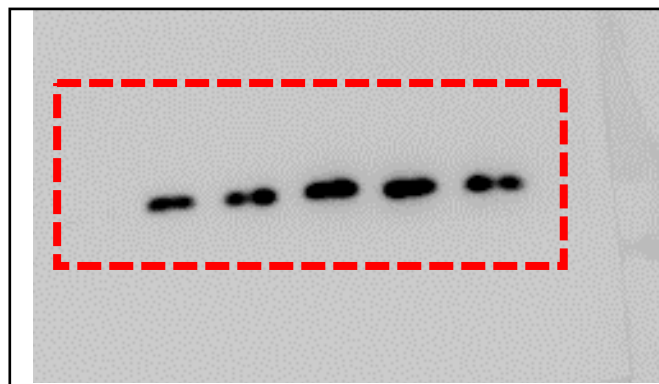

IB:HLA-A

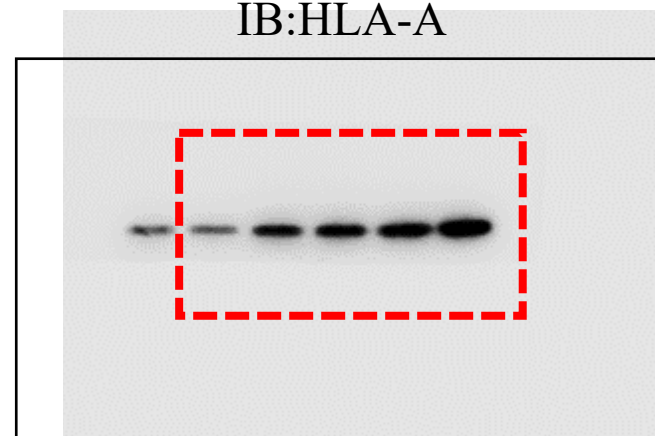

IB:GAPDH

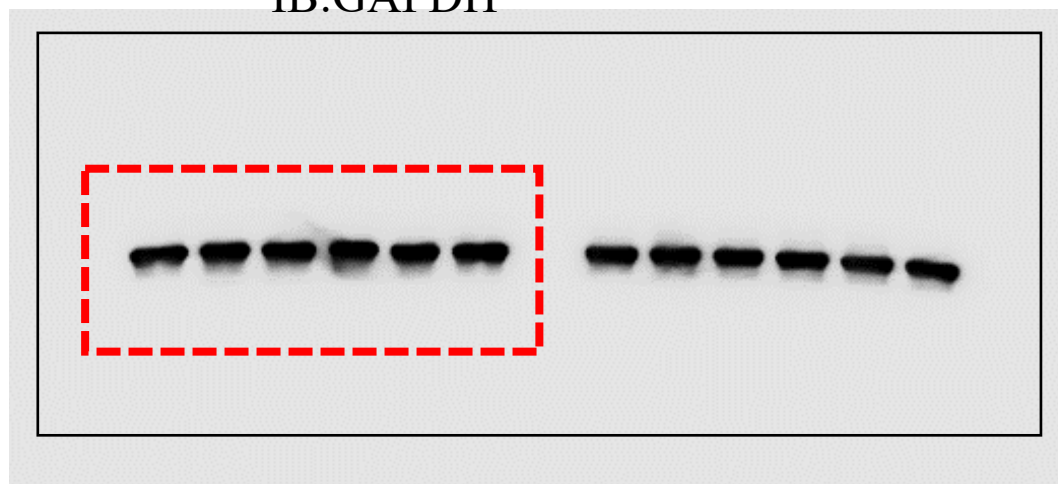

IB:GAPDH

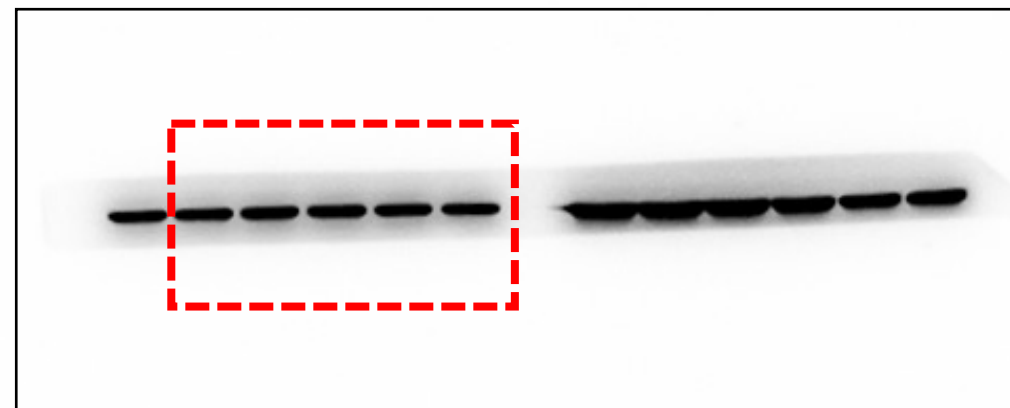

**Full unedited gel for  
Supplemental Figure 5B**

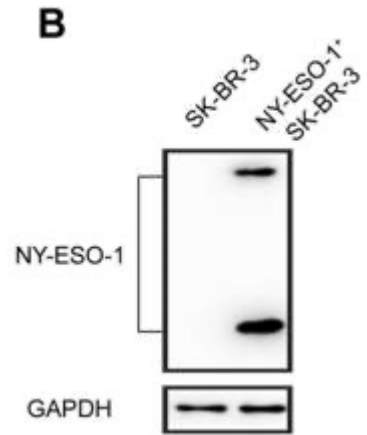

IB:NY-ESO-1

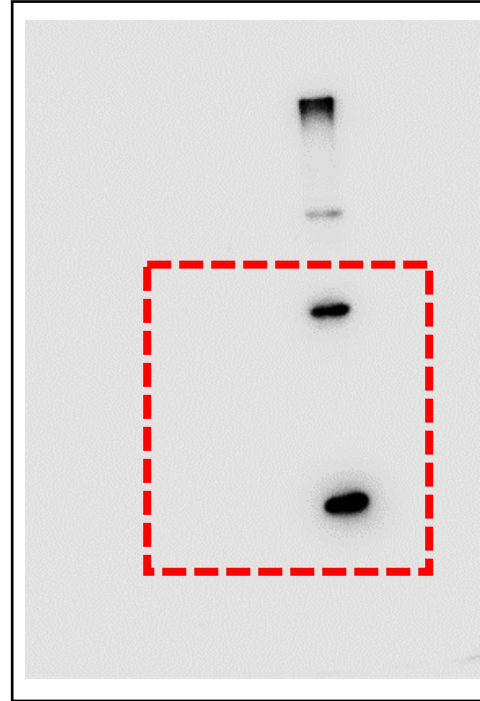

IB:GAPDH

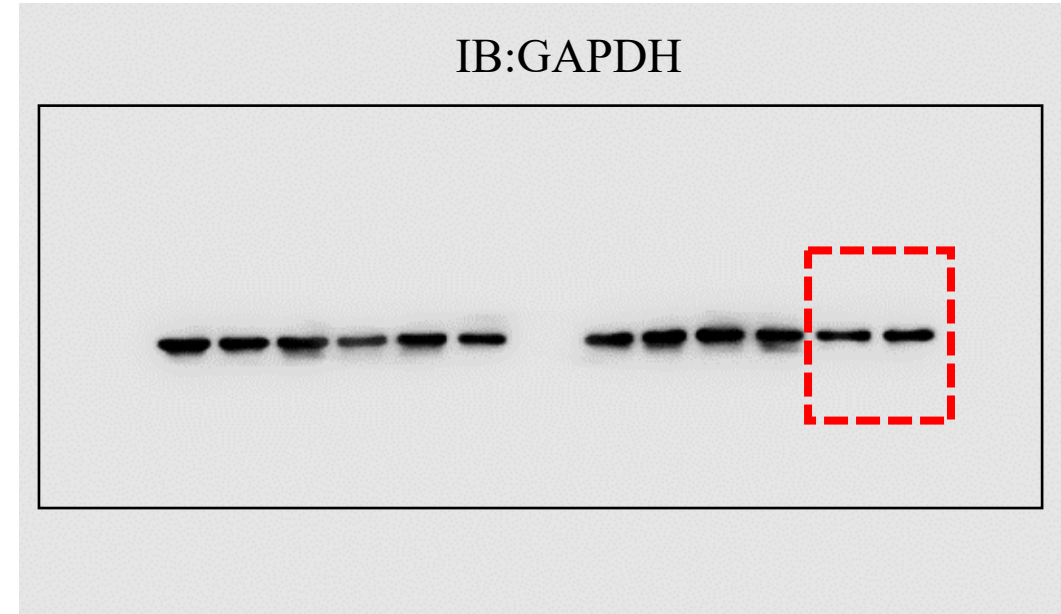

Full unedited gel for  
Supplemental Figure 8A

**A**

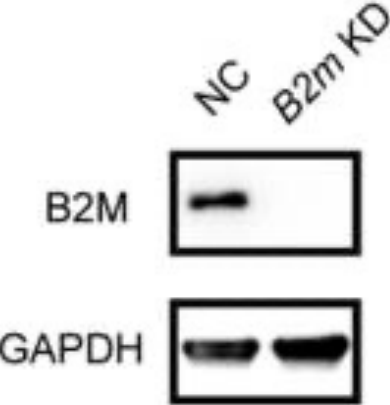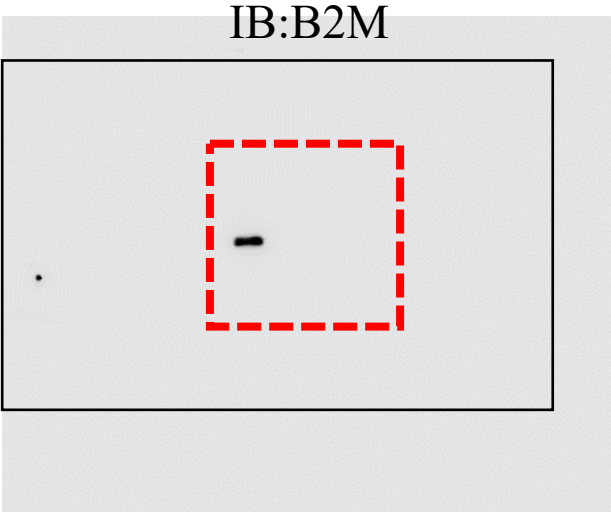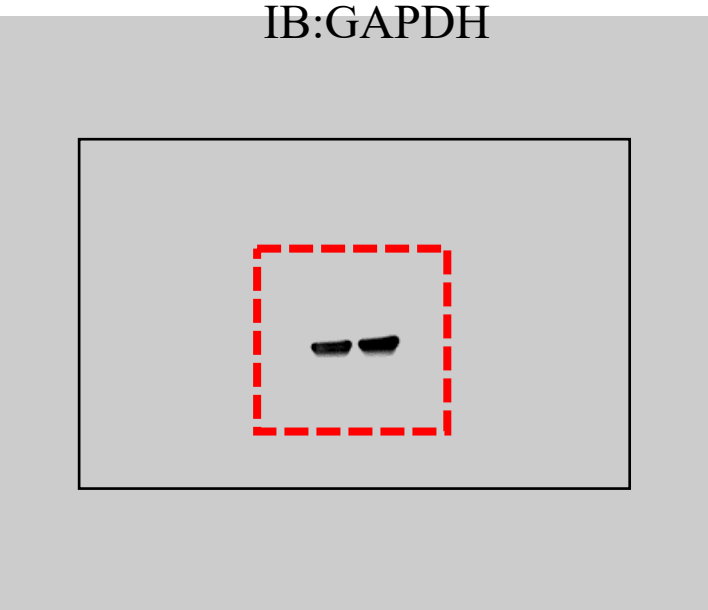



Full unedited gel for  
Supplemental Figure 8B

**B**

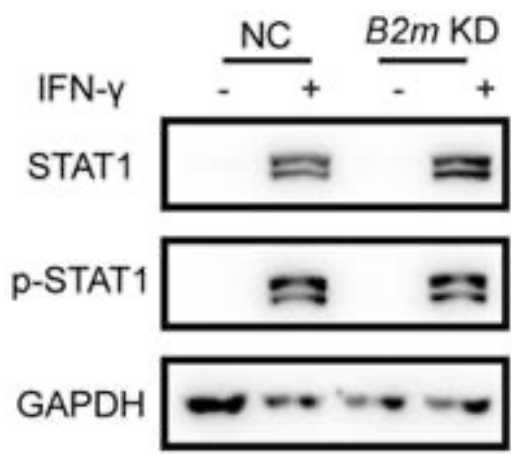

IB:STAT1

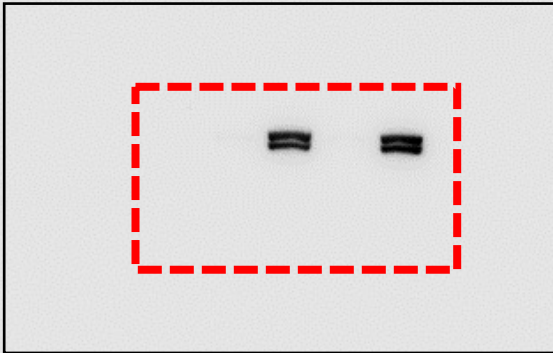

IB:p-STAT1

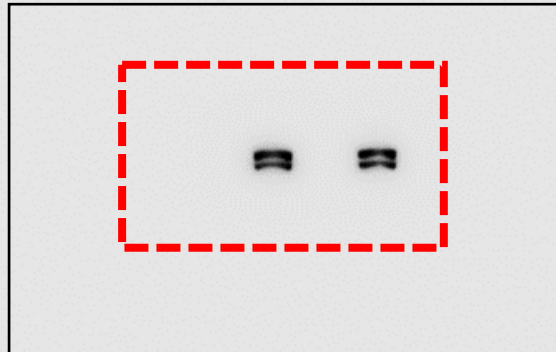

IB:GAPDH

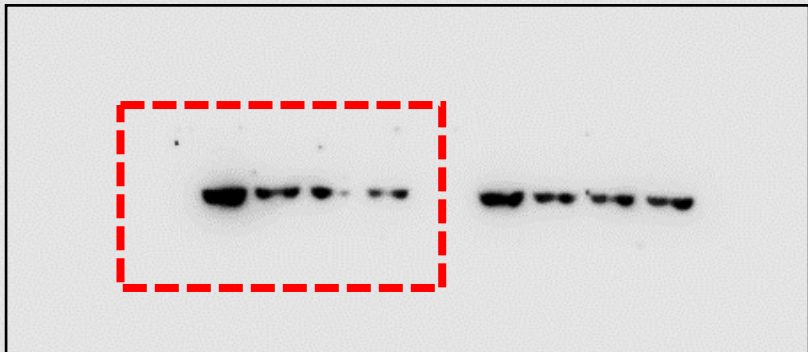

Full unedited gel for  
Supplemental Figure 11B

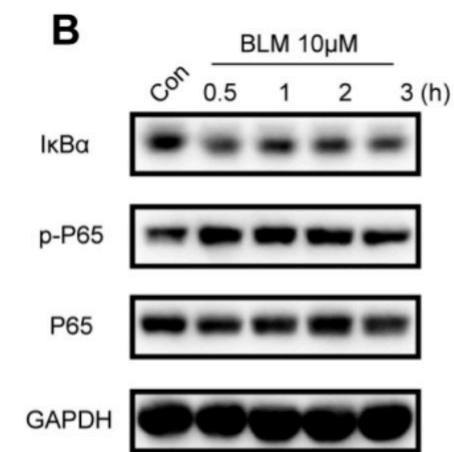

IB:P65

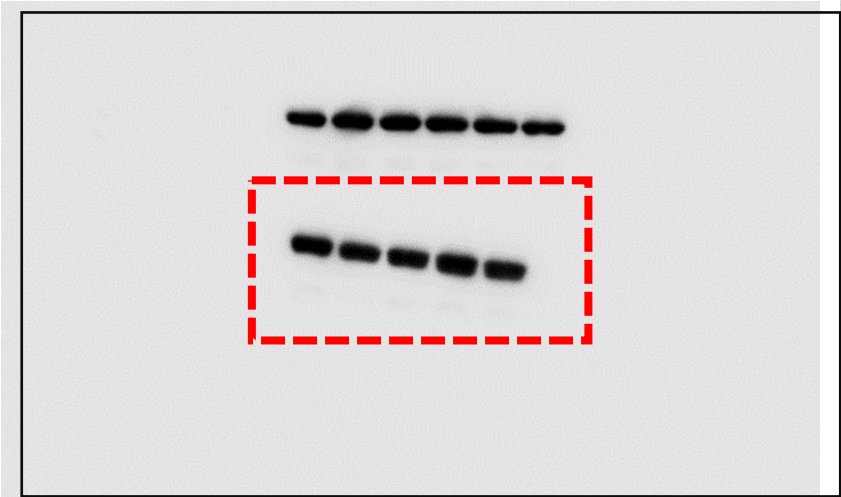

IB:P-P65

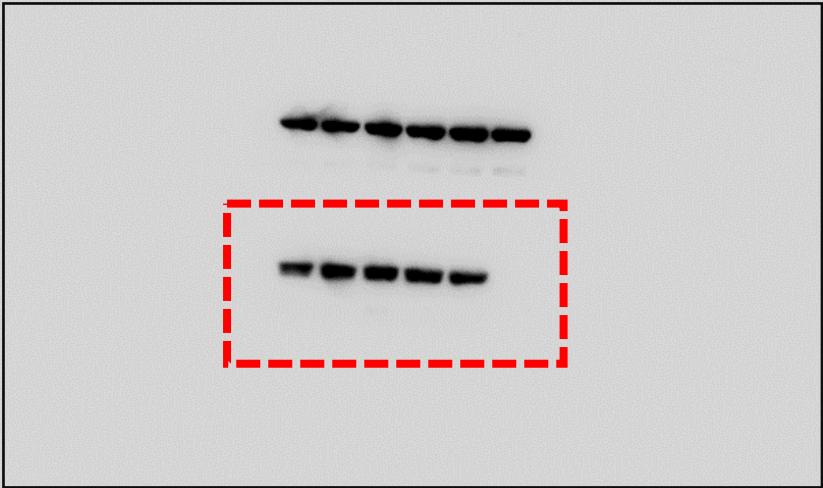

IB:I $\kappa$ B $\alpha$

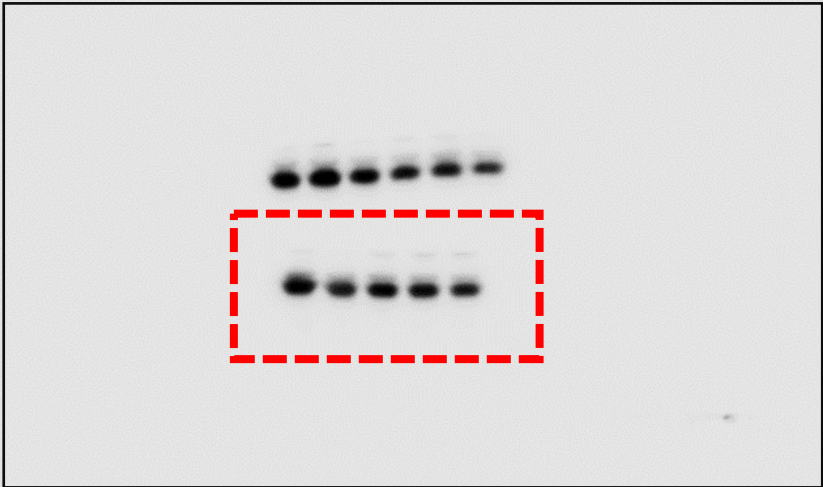

IB:GAPDH

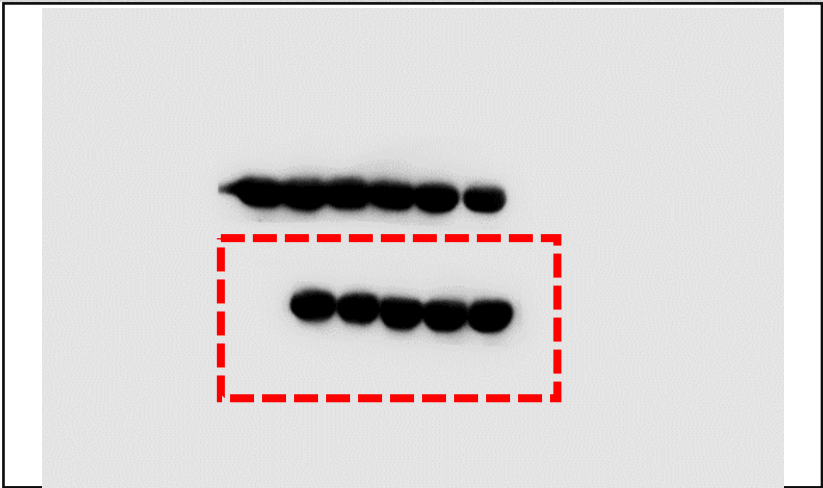

Full unedited gel for  
Supplemental Figure 11C

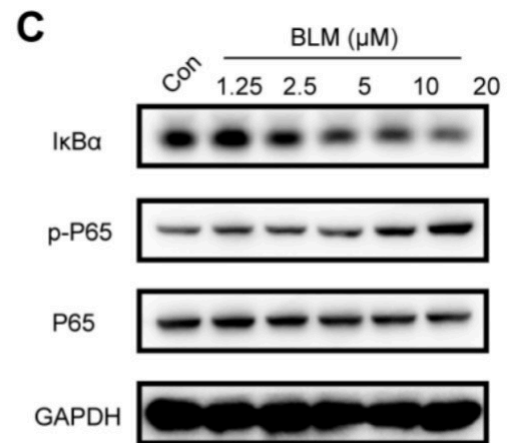

IB:P65

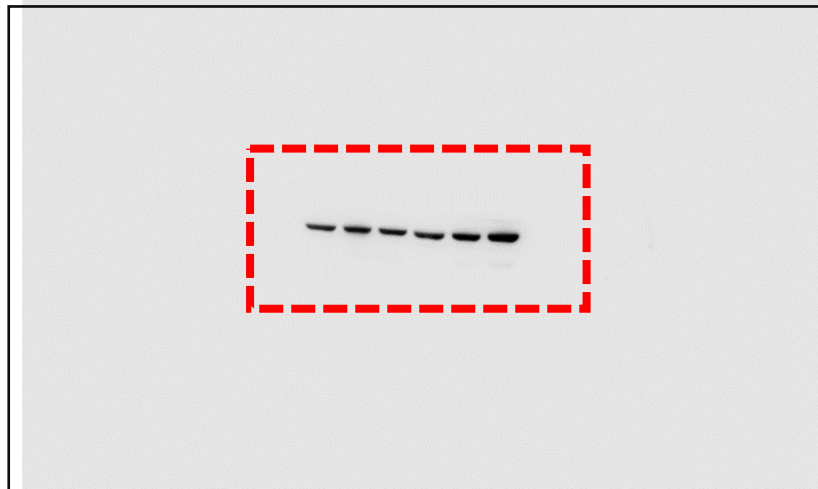

IB:P-P65

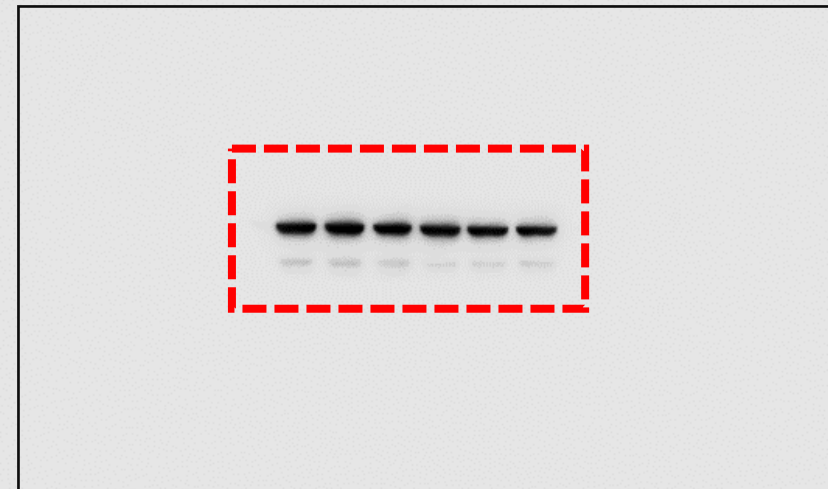

IB:I $\kappa$ B $\alpha$

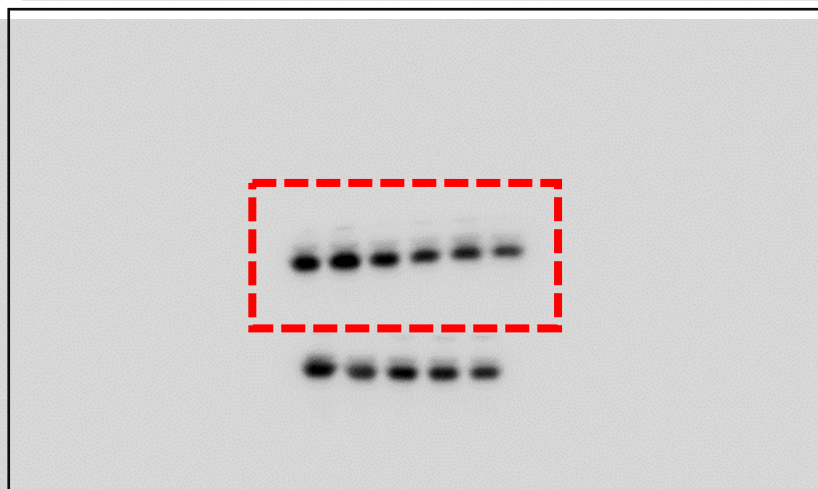

IB:GAPDH

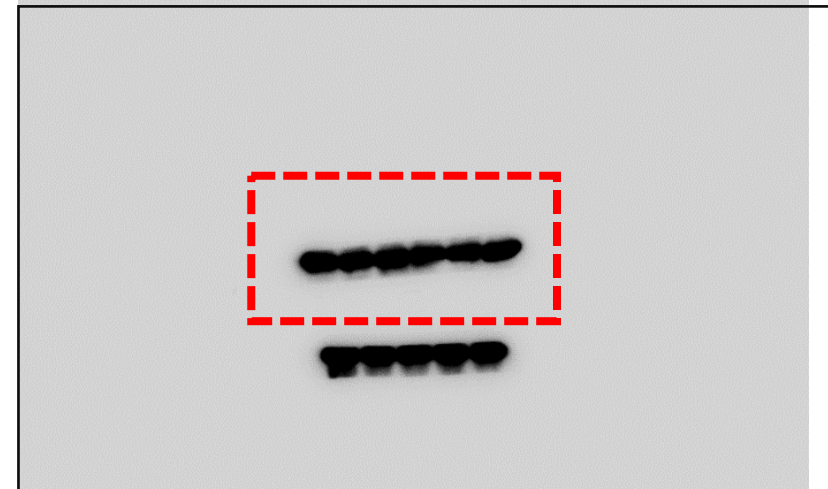



Full unedited gel for  
Supplemental Figure 11D

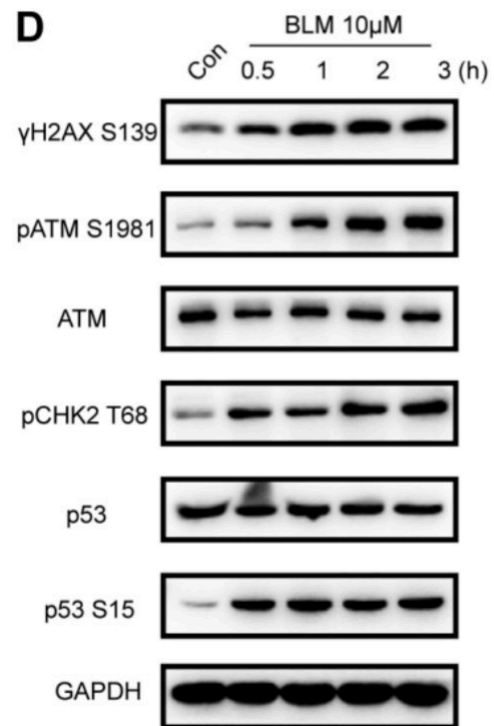

IB: $\gamma$ H2AX S139

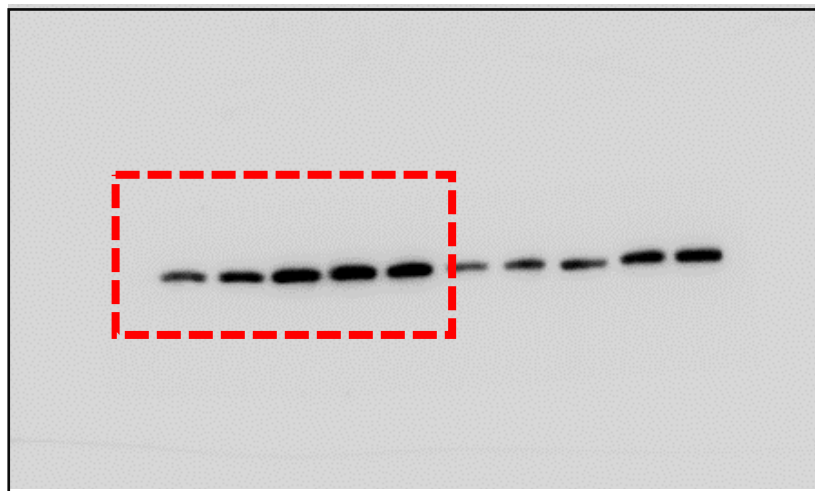

IB:pATM S1981

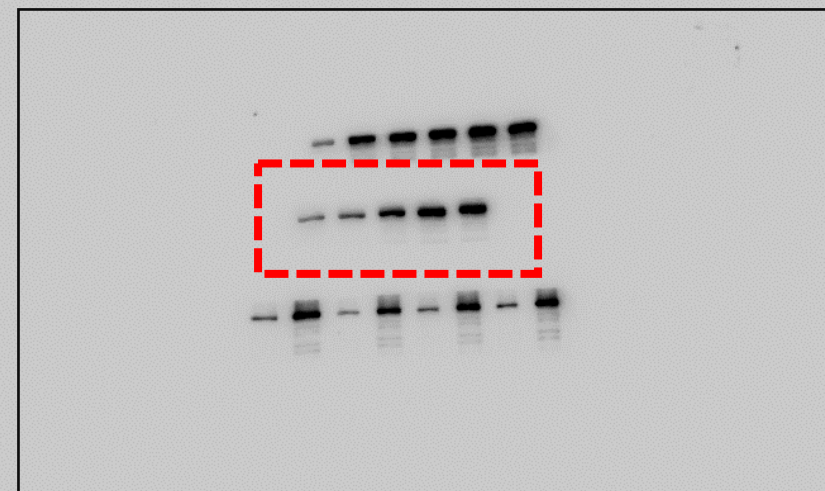

IB:ATM

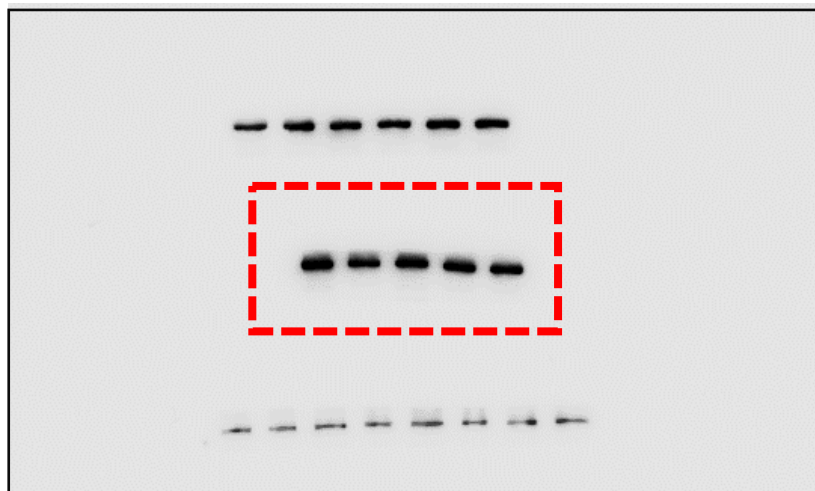

IB:pCHK2 T68

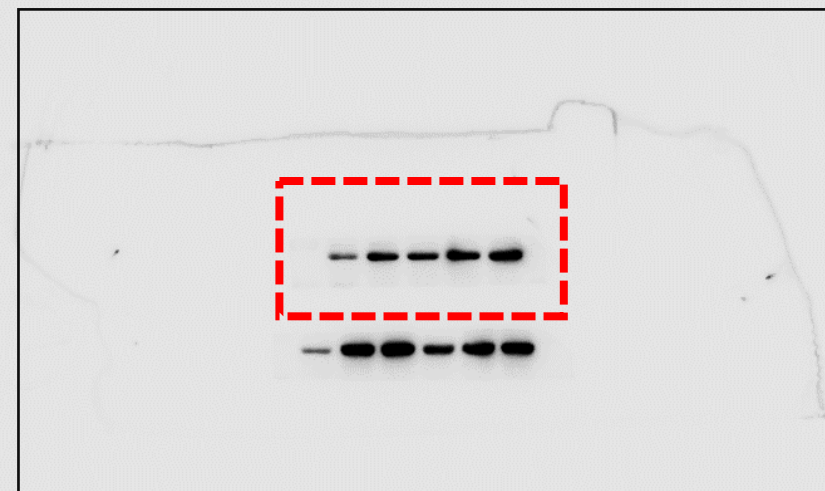

Full unedited gel for  
Supplemental Figure 11D

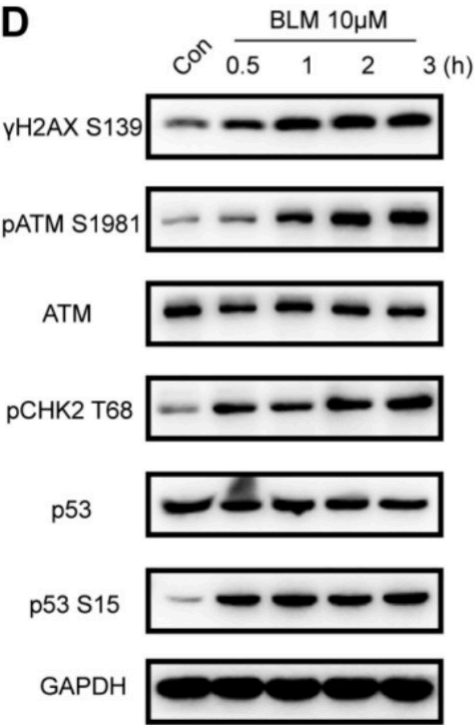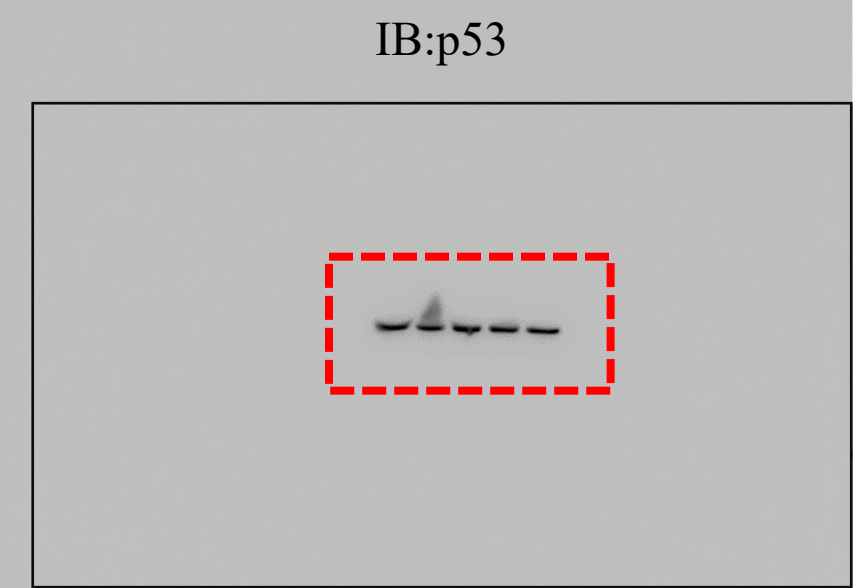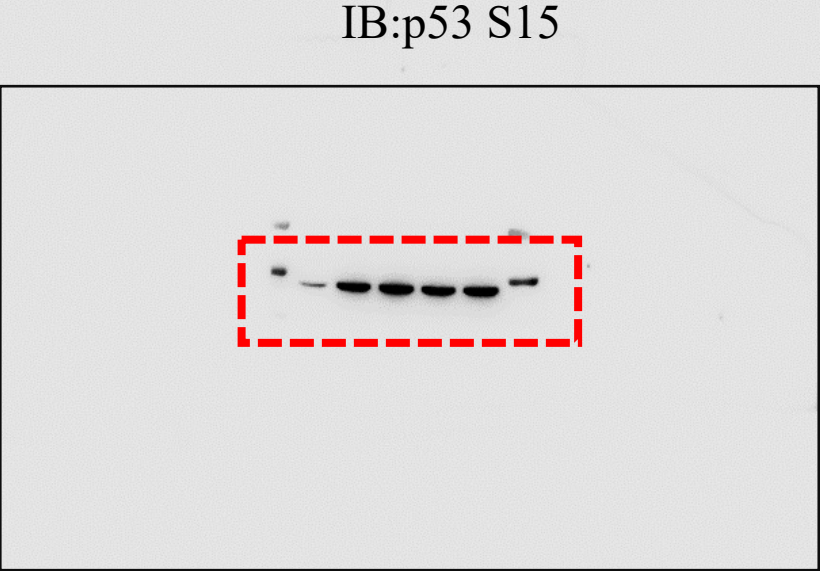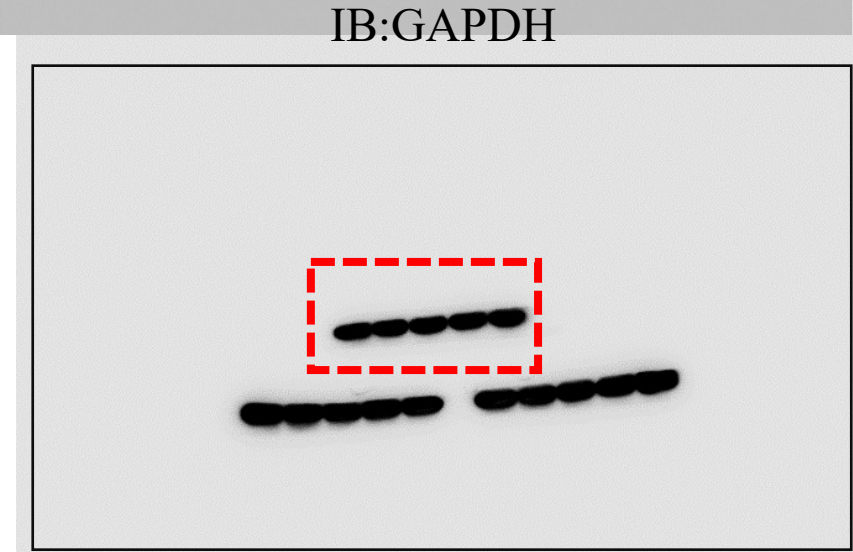



**Full unedited gel for  
Supplemental Figure 11E**

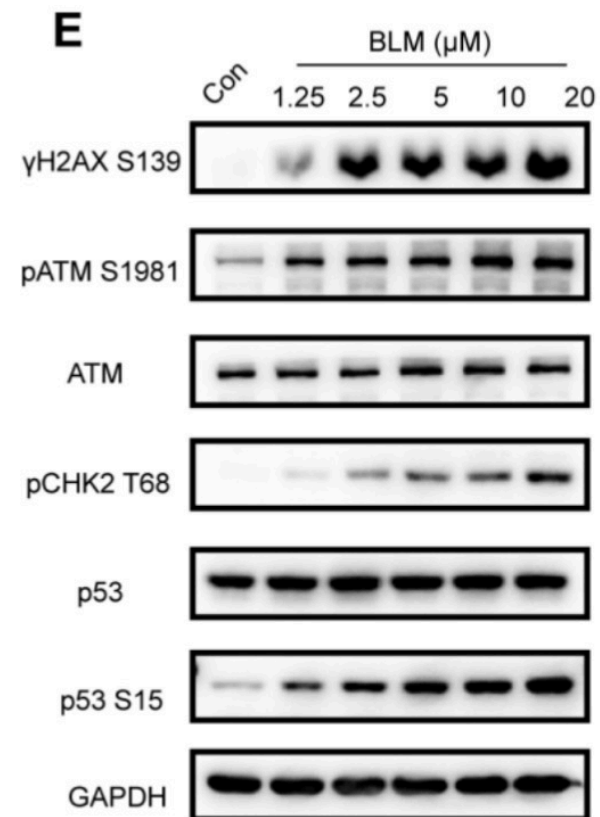

IB: $\gamma\text{H2AX S139}$

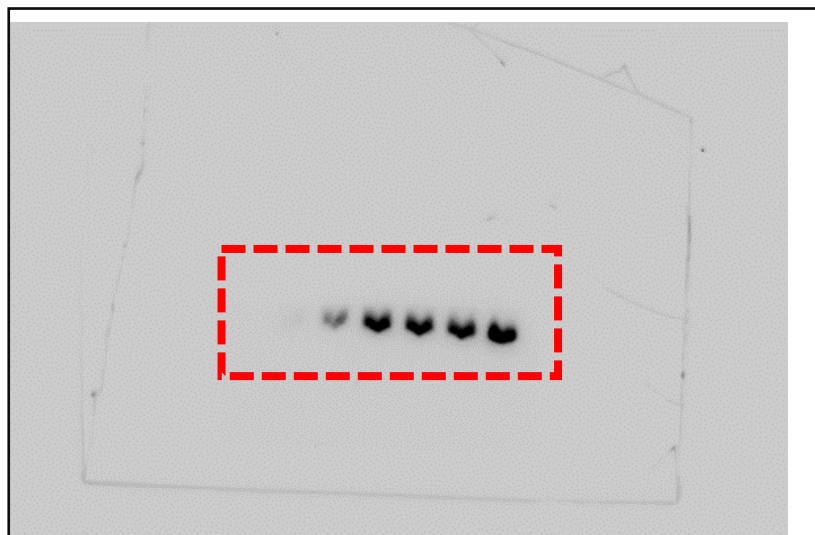

IB:pATM S1981

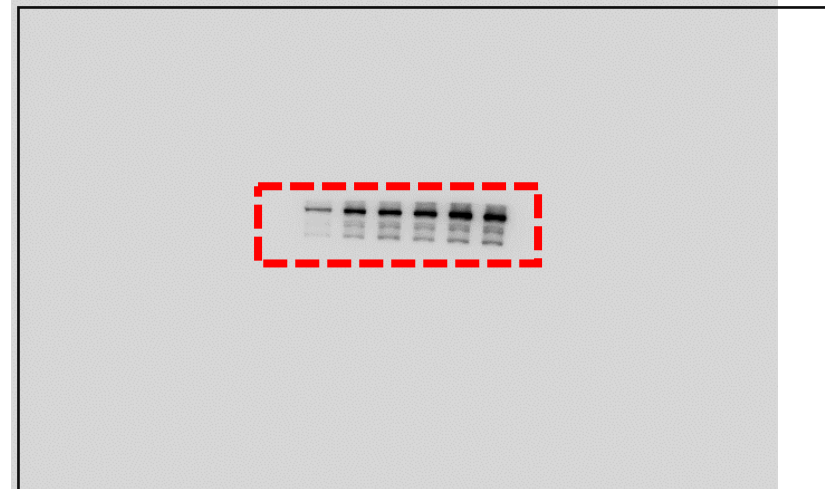

IB:ATM

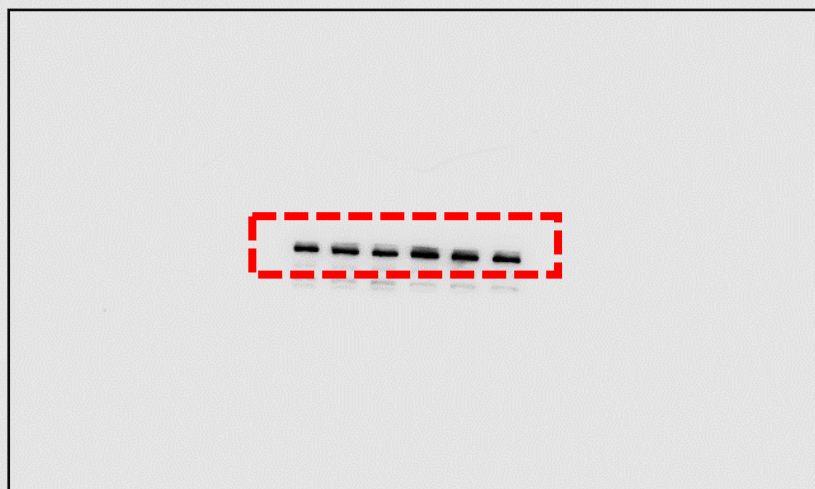

IB:pCHK2 T68

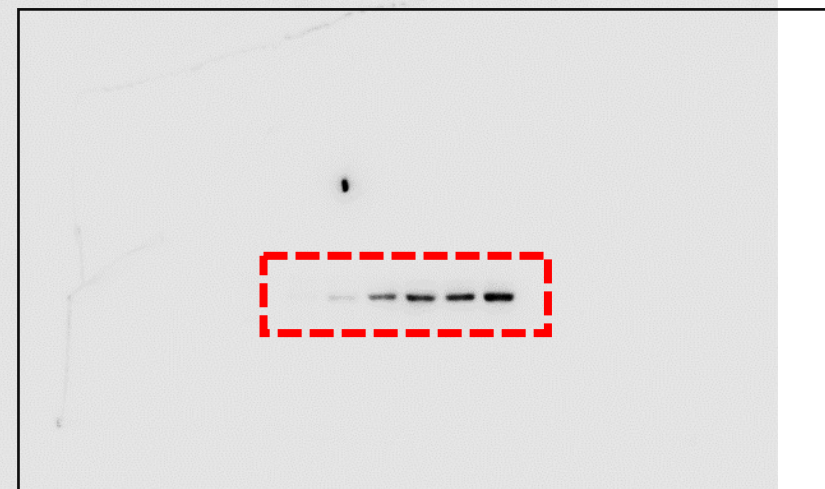

Full unedited gel for  
Supplemental Figure 11E

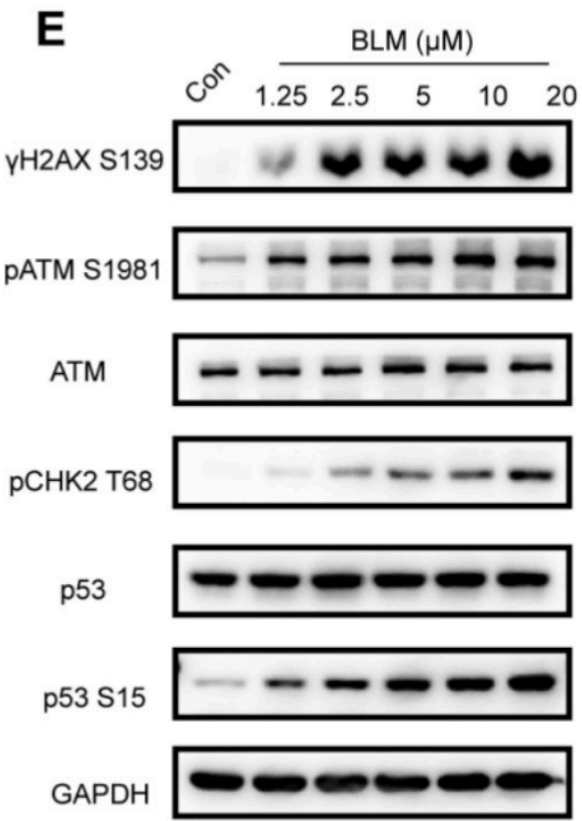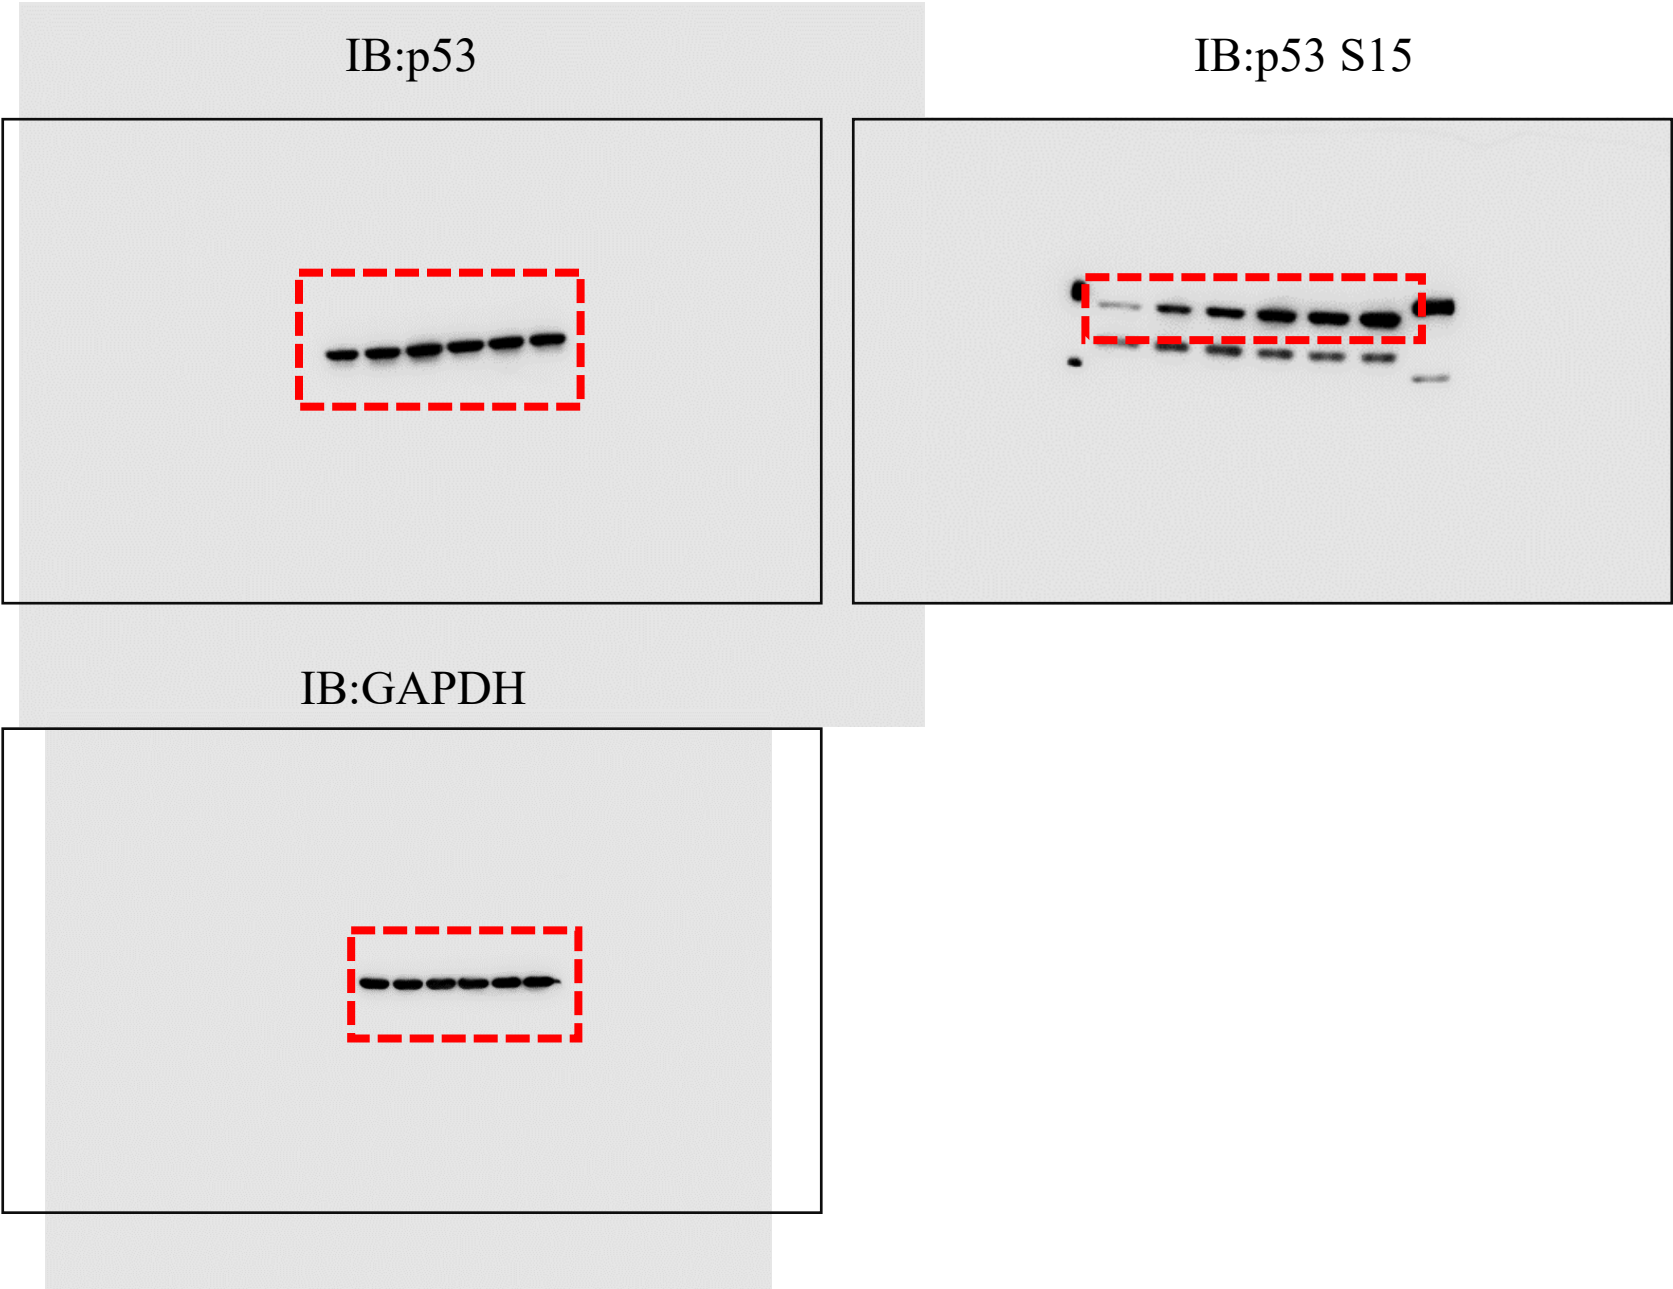

**Full unedited gel for  
Supplemental Figure 11F**

**F**

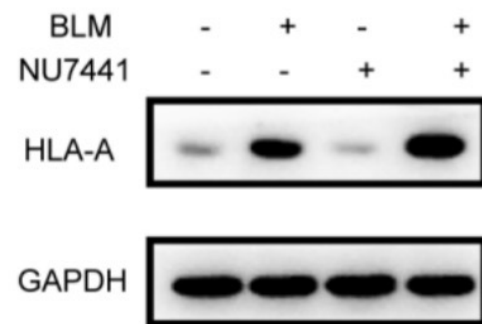

IB:HLA-A

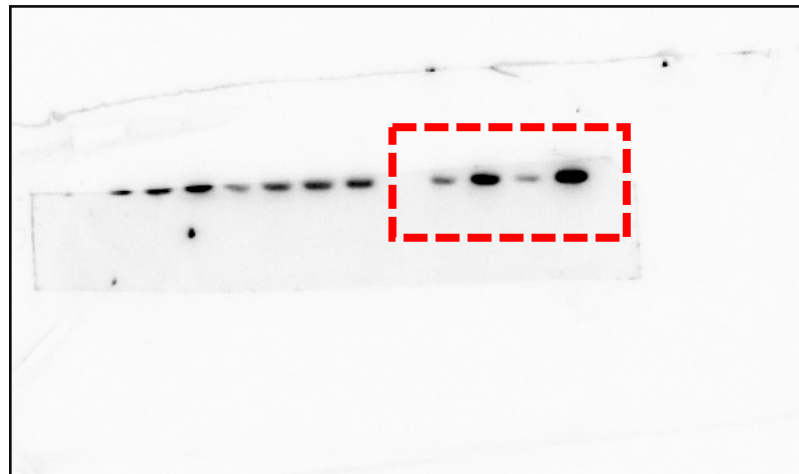

IB:GAPDH

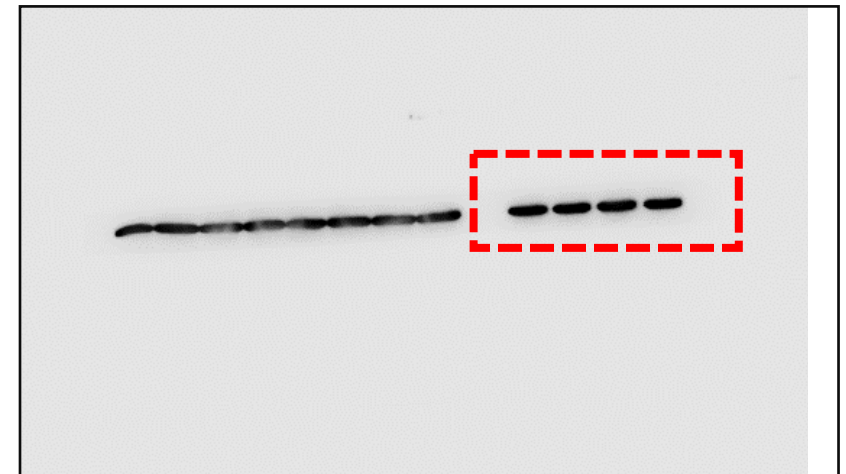

Full unedited gel for  
Supplemental Figure 11G

**G**

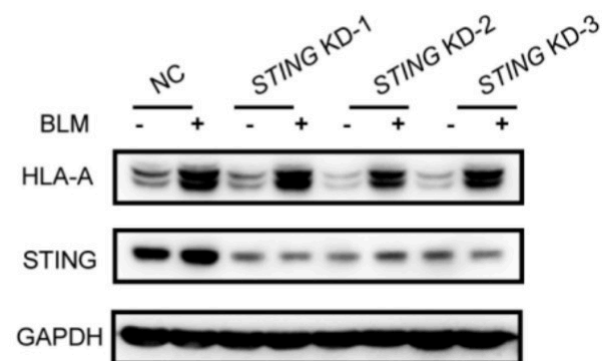

IB:HLA-A

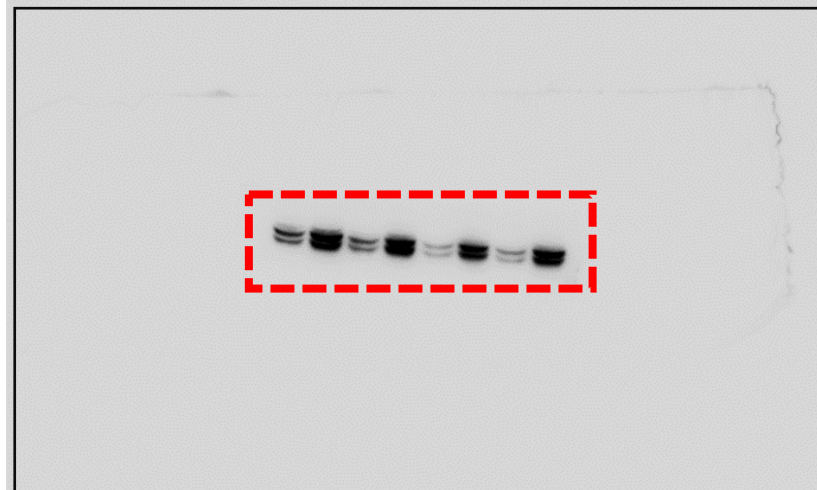

IB:STING

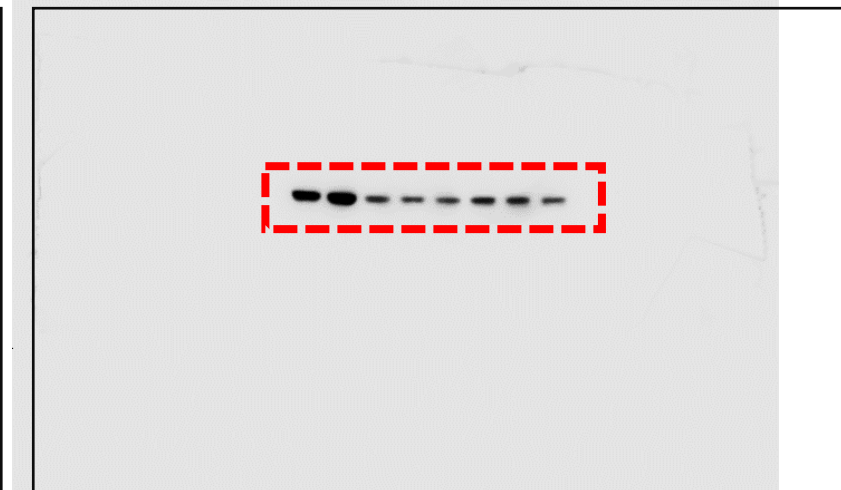

IB:GAPDH

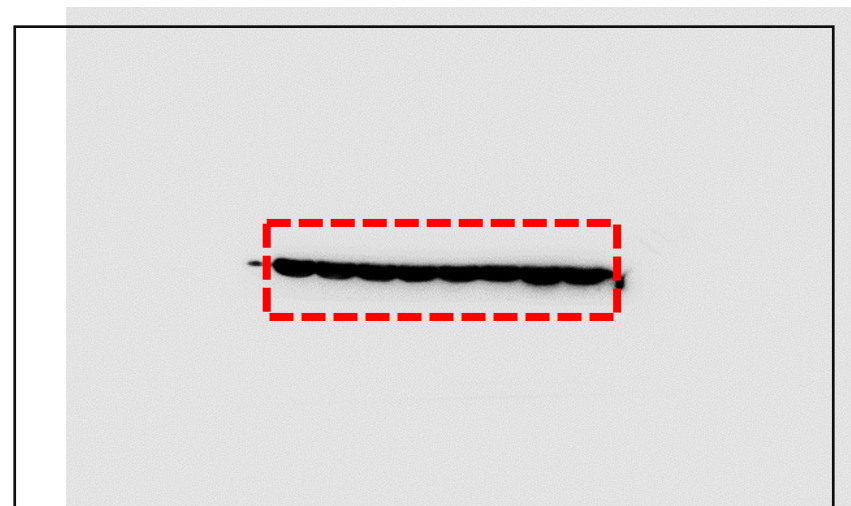



Full unedited gel for  
Supplemental Figure 11H

H

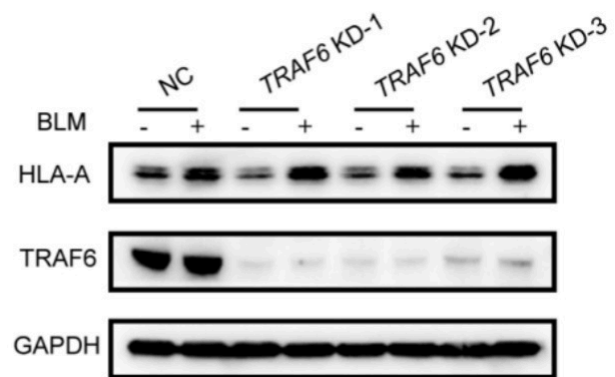

IB:HLA-A

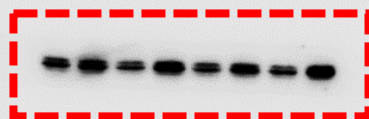

IB:TRAF6

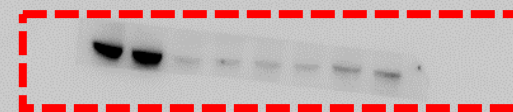

IB:GAPDH

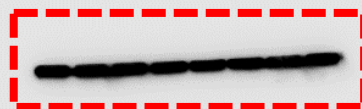

Full unedited gel for  
Supplemental Figure 11I

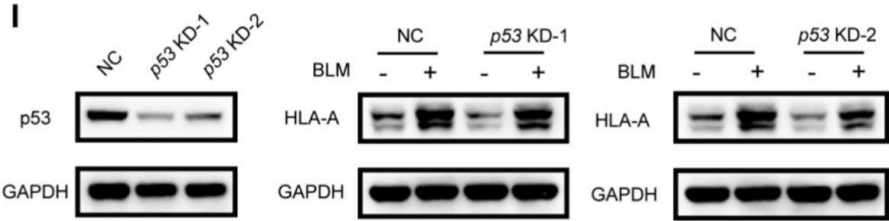

IB:p53

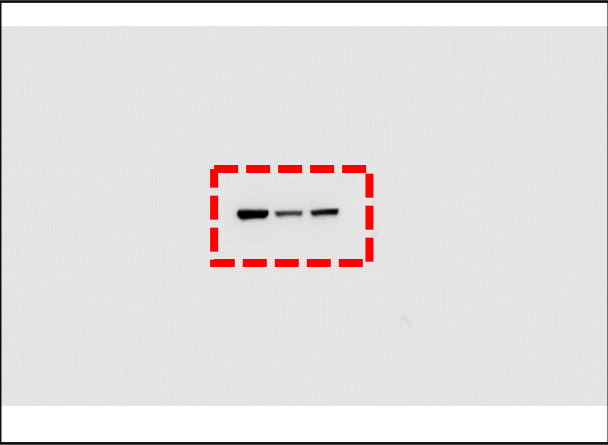

IB:HLA-A

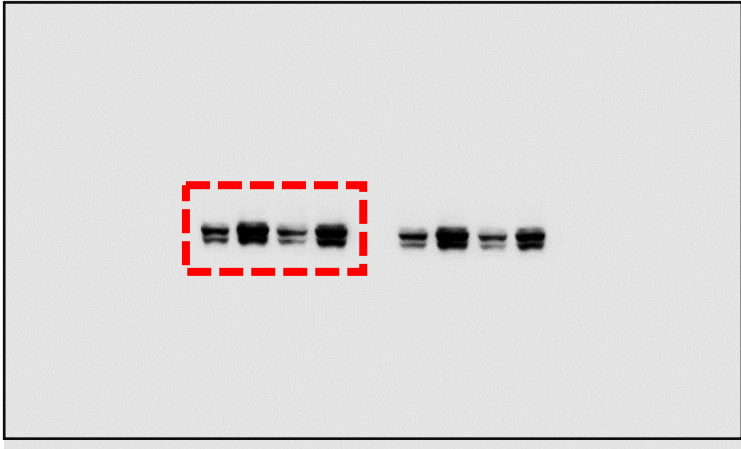

IB:HLA-A

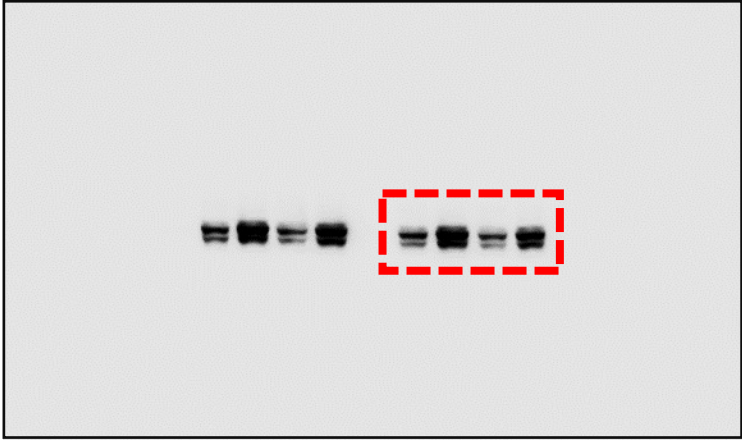

IB:GAPDH

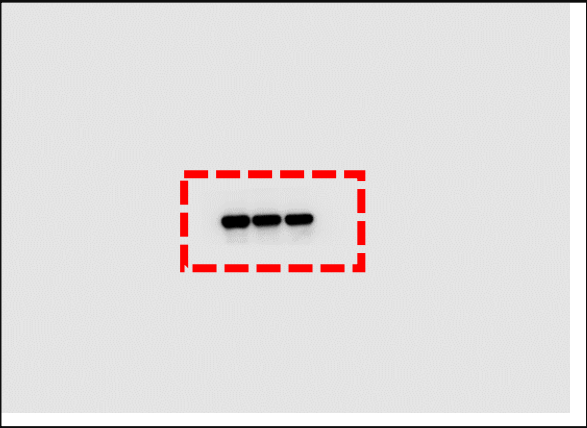

IB:GAPDH

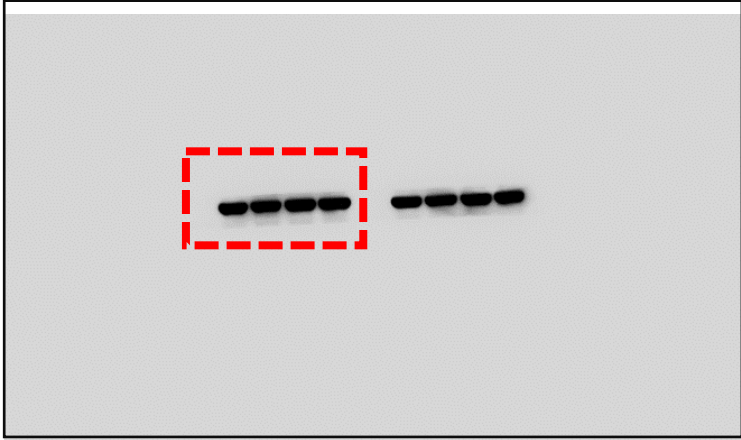

IB:GAPDH

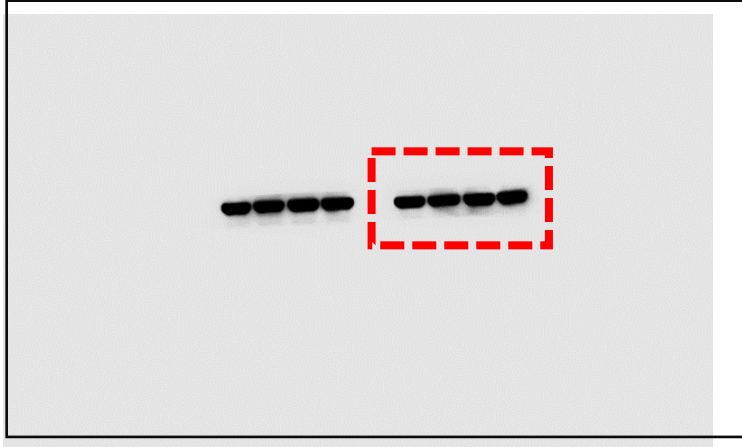



Full unedited gel for  
Supplemental Figure 11J

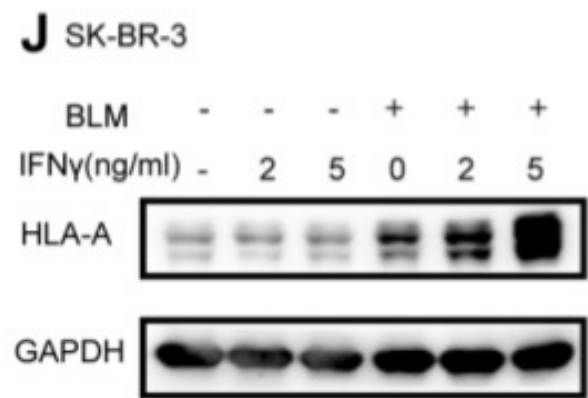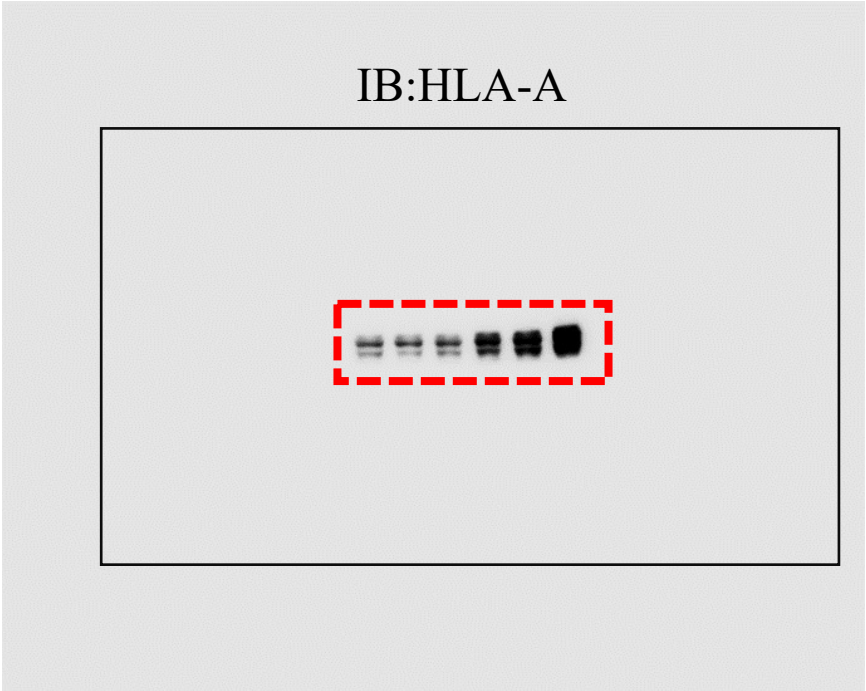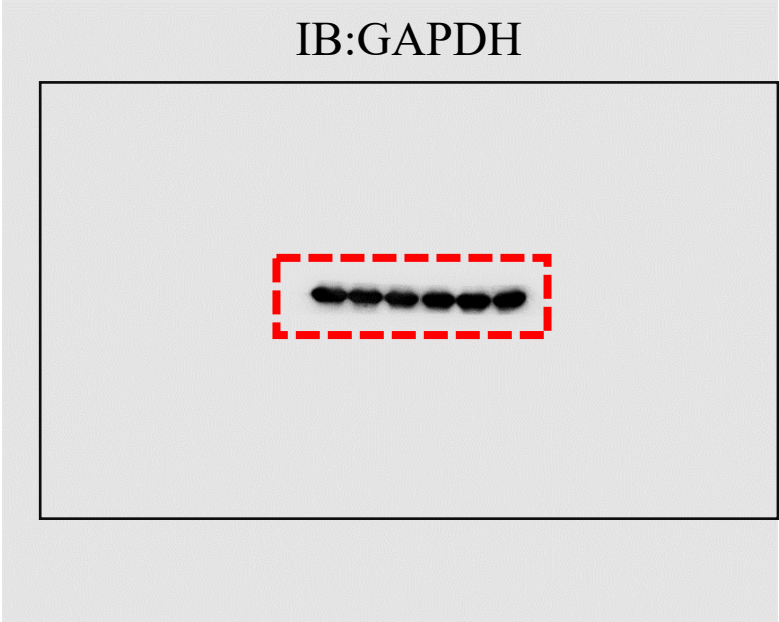

Full unedited gel for  
Supplemental Figure 11K

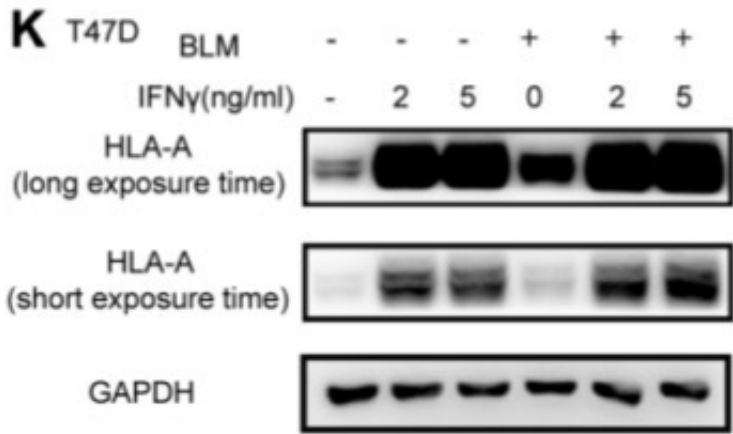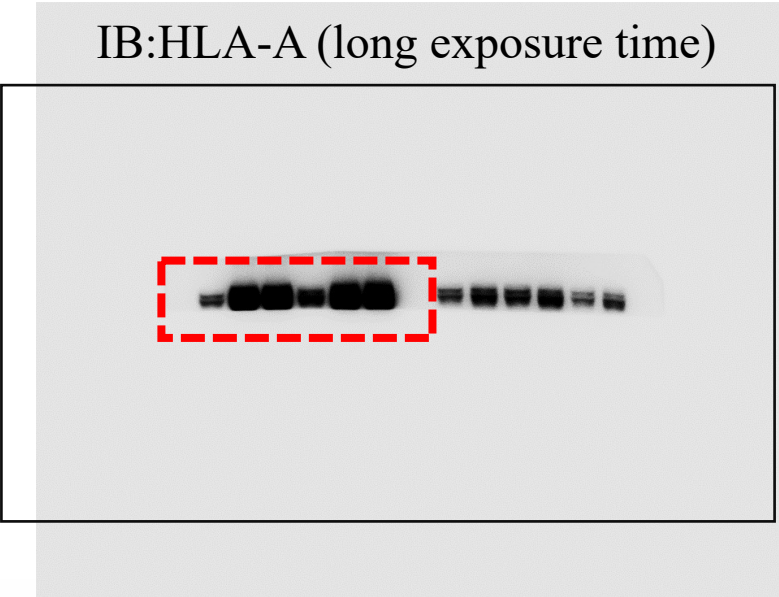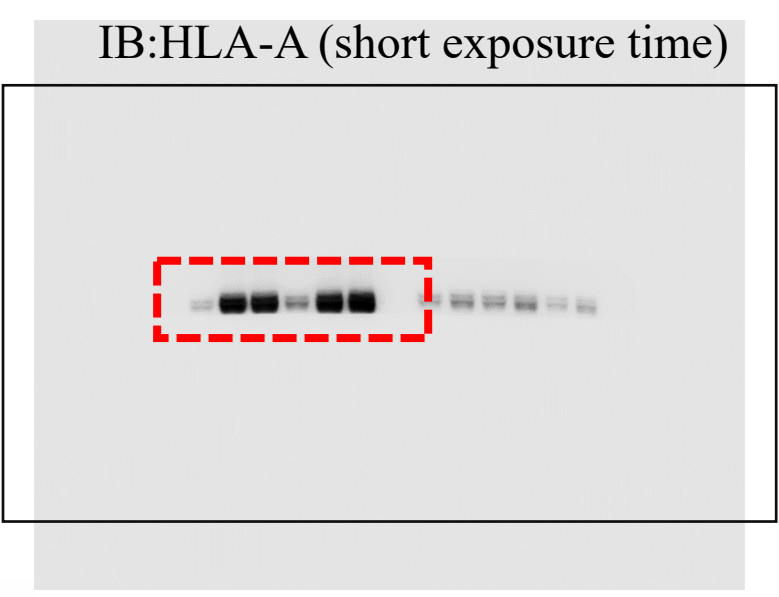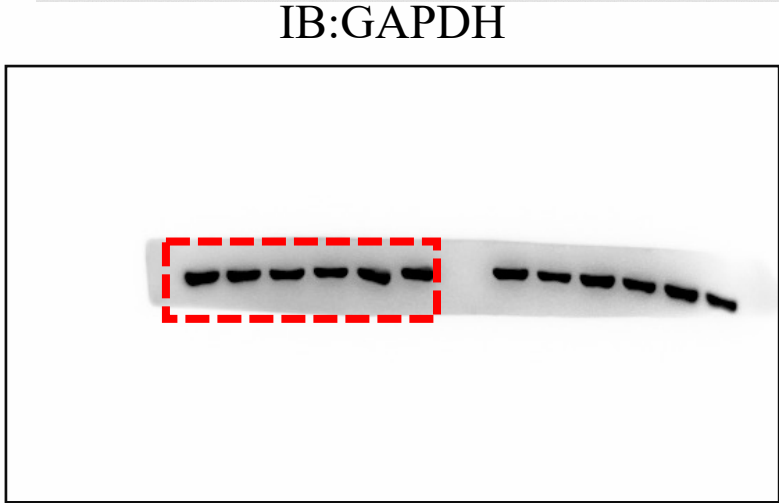

Full unedited gel for  
Supplemental Figure 15A

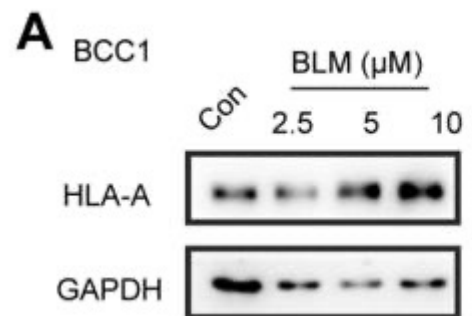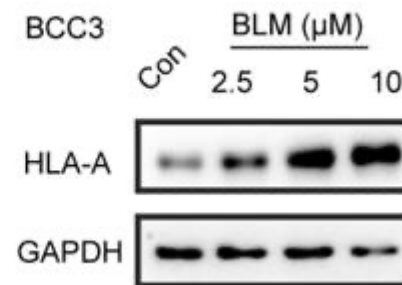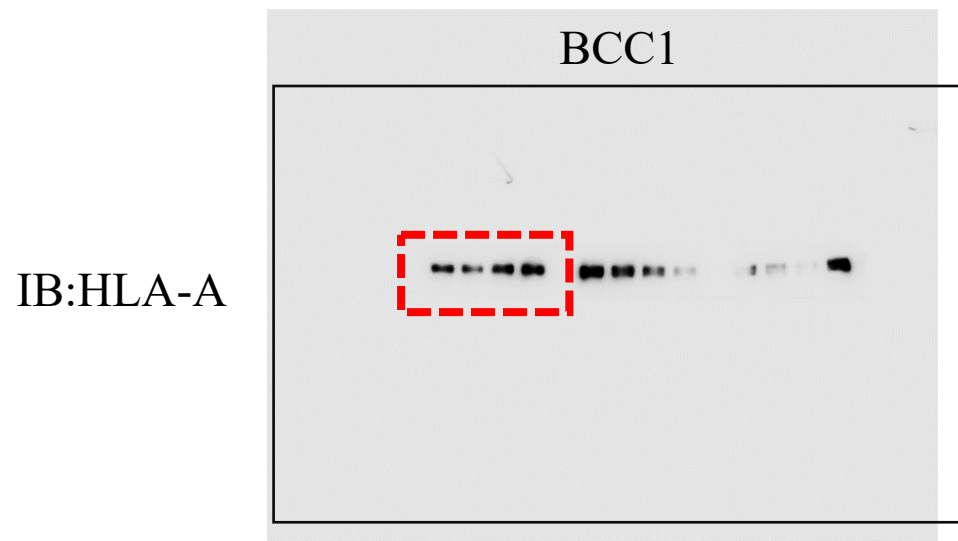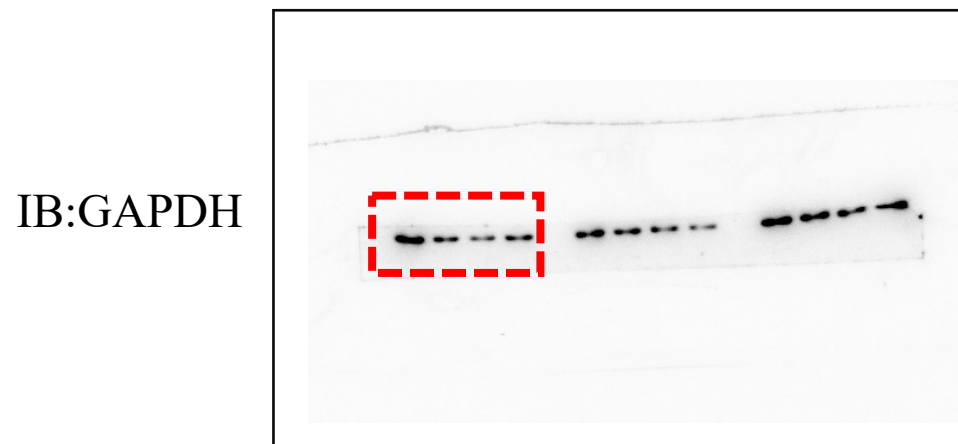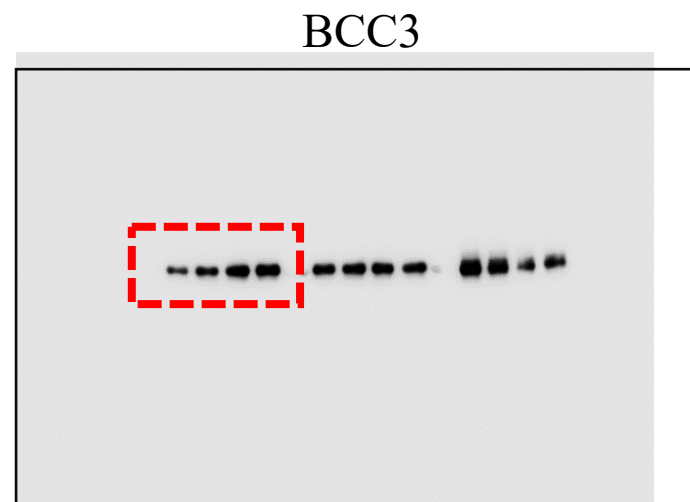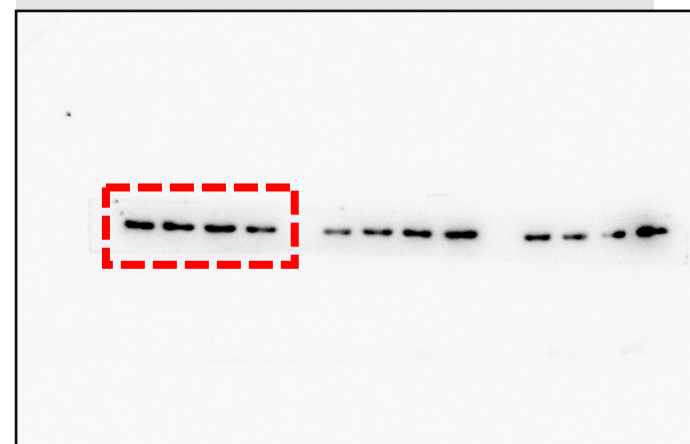

**Full unedited gel for  
Supplemental Figure 15A**

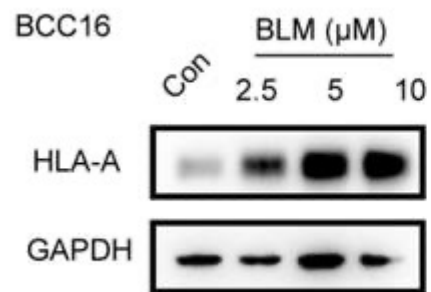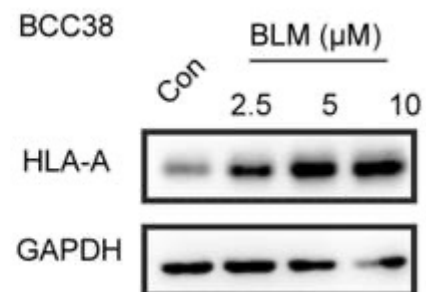

BCC16

BCC38

IB:HLA-A

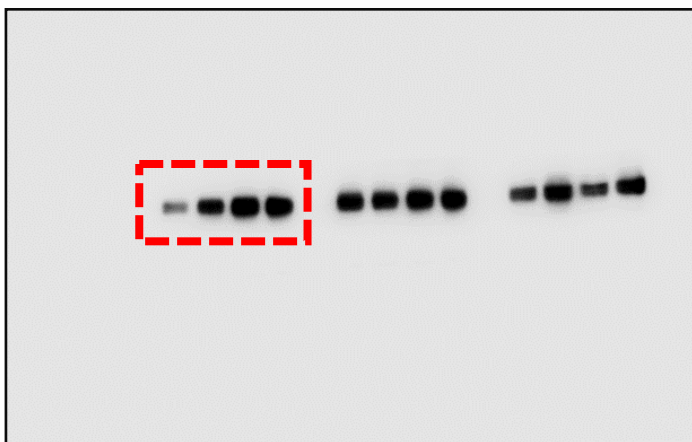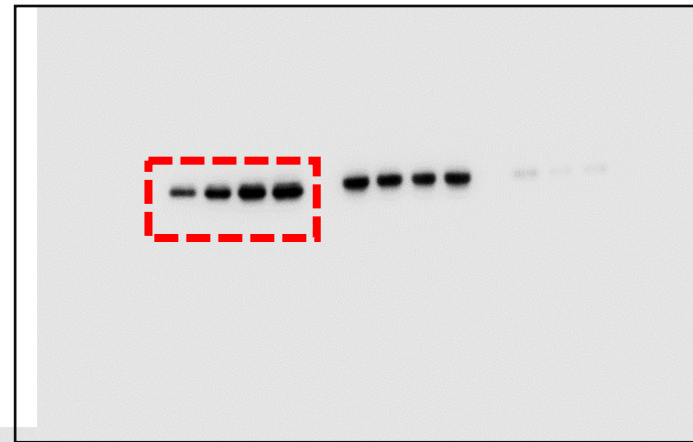

IB:GAPDH

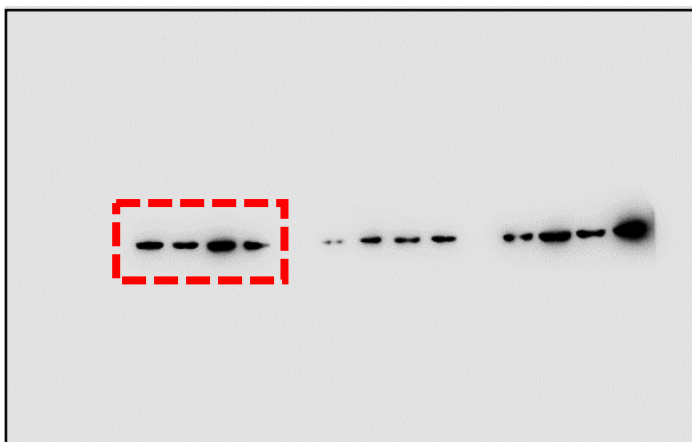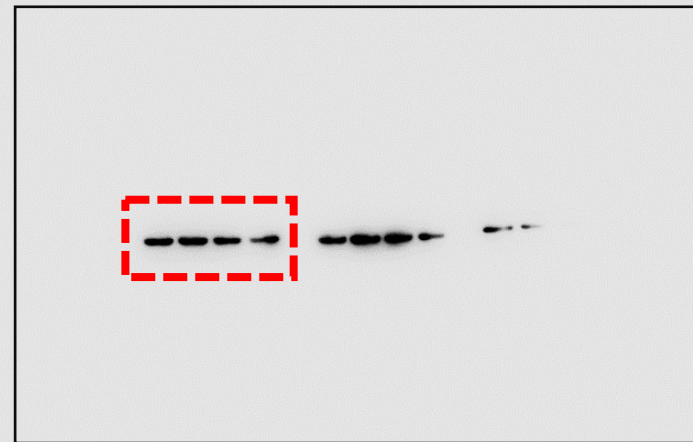



Full unedited gel for  
Supplemental Figure 15A

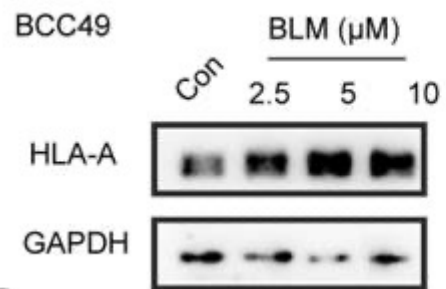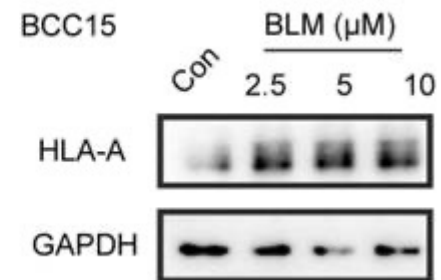

BCC49

IB:HLA-A

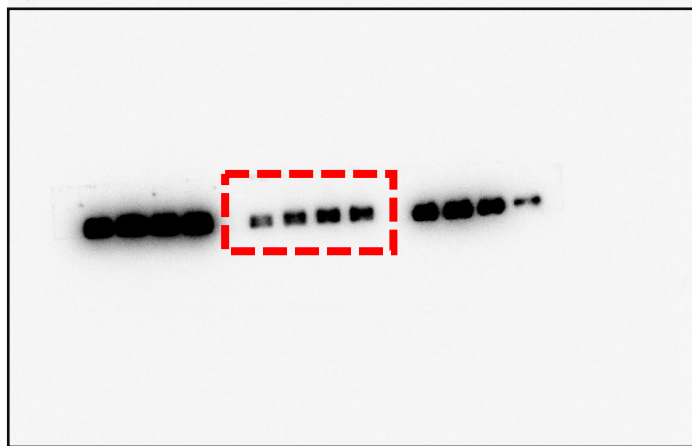

IB:GAPDH

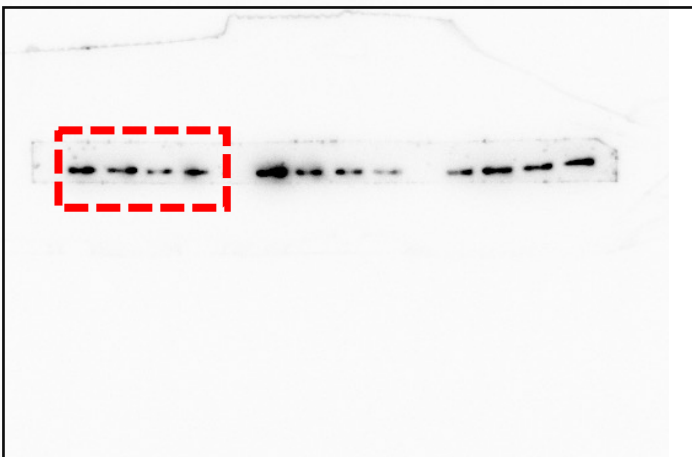

BCC15

IB:HLA-A

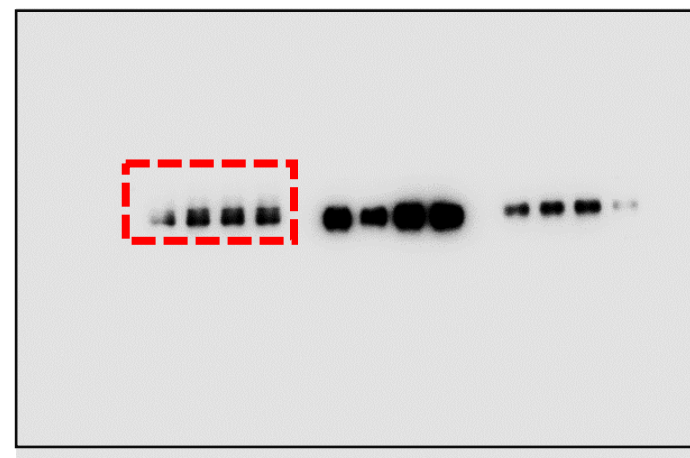

IB:GAPDH

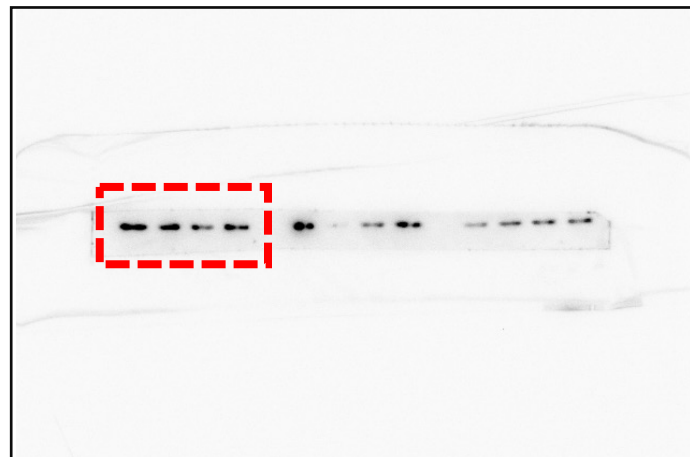

Full unedited gel for  
Supplemental Figure 15A

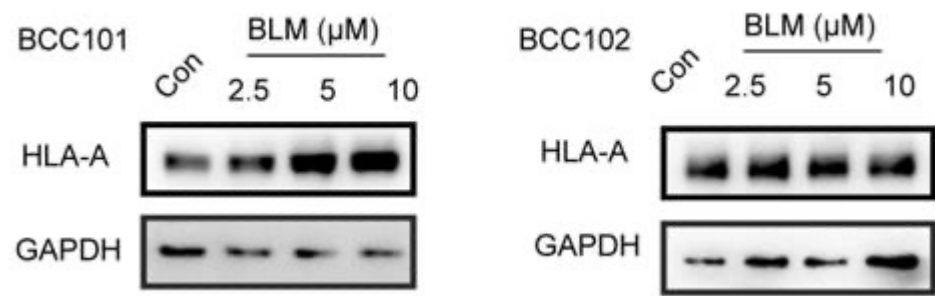

BCC101

BCC102

IB:HLA-A

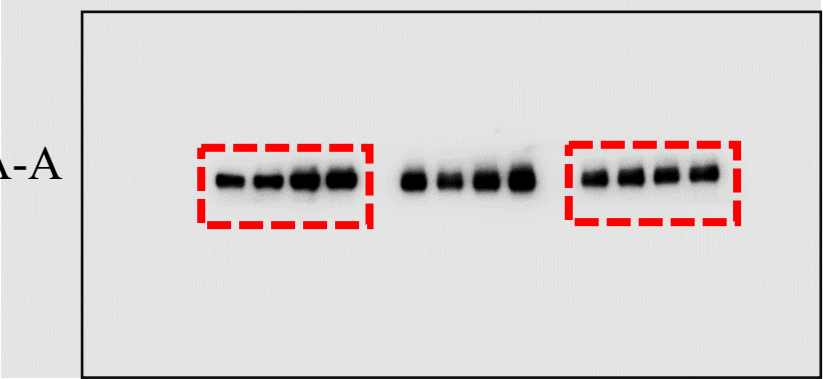

BCC101

BCC101

IB:GAPDH

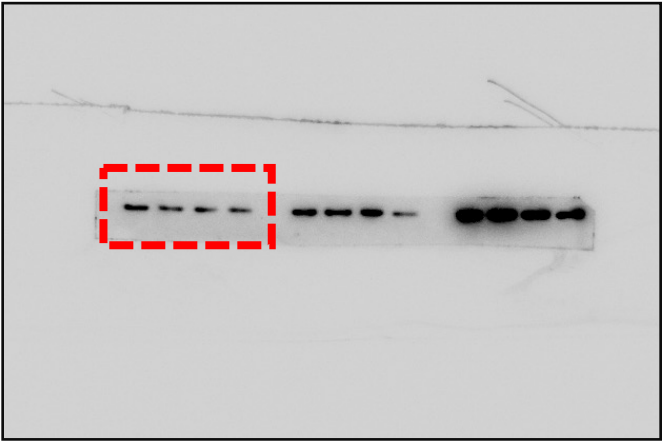

IB:GAPDH

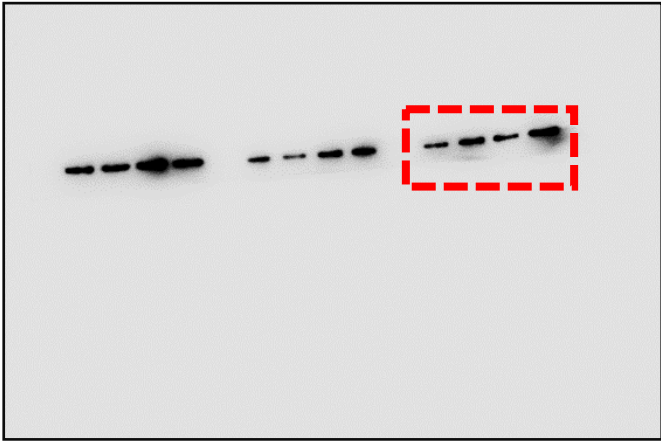

Supplement: sd2 [file 2]
